# Supplementary material for: Novel imidazole derivatives as potential aromatase and monoamine oxidase-B inhibitors against breast cancer
Source: Royal Society of Chemistry journal article supplement (doi:10.1039/d2nj00424k), 2022-01-01
Supplement: d2nj00424k1.pdf [file d2nj00424k1.pdf]

Formula Predictor Report - ARZ-1\_119.lcd

Page 1 of 1

Data File: C:\LabSolutions\Data\Analiz\derya\ARZ-1\_119.lcd

| Elmt | Val. | Min | Max | Use Adduct |
|------|------|-----|-----|------|------|-----|-----|------|------|-----|-----|------|------|-----|-----|------------|
| H    | 1    | 10  | 40  | O    | 2    | 0   | 4   | S    | 2    | 1   | 2   | Ru   | 2    | 0   | 0   | H          |
| C    | 4    | 10  | 40  | F    | 1    | 0   | 0   | Cl   | 1    | 0   | 0   | Pd   | 2    | 0   | 0   |            |
| N    | 3    | 3   | 5   | P    | 3    | 0   | 0   | Br   | 1    | 0   | 0   | I    | 3    | 0   | 0   |            |

Error Margin (ppm): 5  
 HC Ratio: unlimited  
 Max Isotopes: 3  
 MSn Iso RI (%): 10.00

DBE Range: 5.0 - 25.0  
 Apply N Rule: yes  
 Isotope RI (%): 1.00  
 MSn Logic Mode: AND

Electron Ions: both  
 Use MSn Info: yes  
 Isotope Res: 9000  
 Max Results: 150

Event#: 1 MS(E+) Ret. Time : 3.000 -> 3.120 Scan# : 451 -> 469

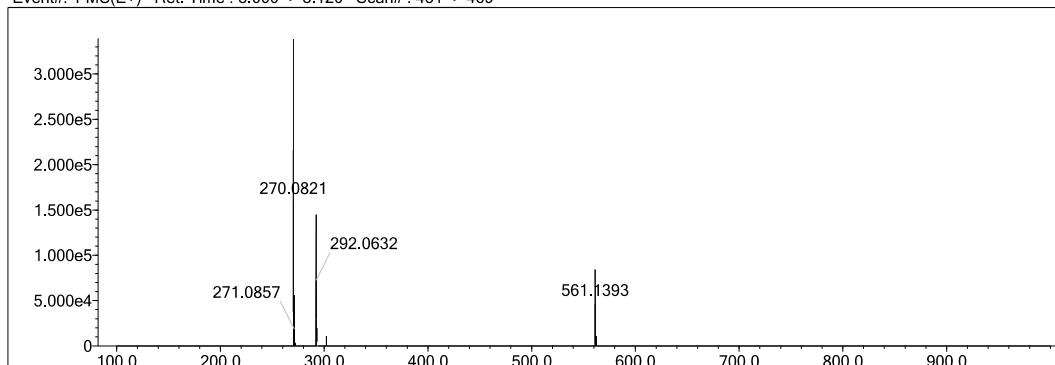

Measured region for 270.0821 m/z

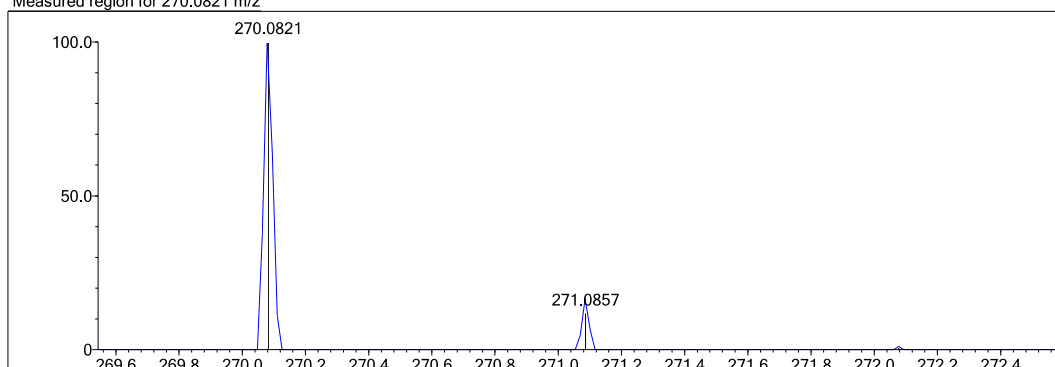

C13 H11 N5 S [M+H]<sup>+</sup> : Predicted region for 270.0808 m/z

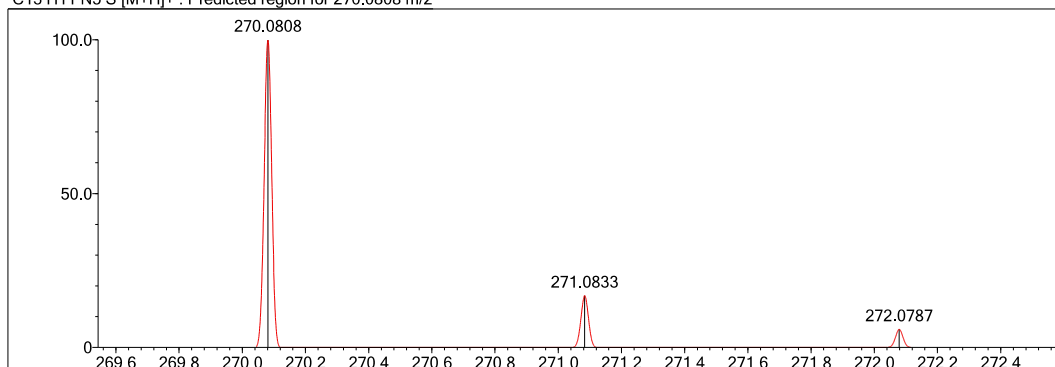

| Rank | Score | Formula (M)  | Ion                | Meas. m/z | Pred. m/z | Df. (mDa) | Df. (ppm) | Iso   | DBE  |
|------|-------|--------------|--------------------|-----------|-----------|-----------|-----------|-------|------|
| 1    | 67.39 | C13 H11 N5 S | [M+H] <sup>+</sup> | 270.0821  | 270.0808  | 1.3       | 4.81      | 74.48 | 11.0 |

Figure S1. Compound 2a HRMS report

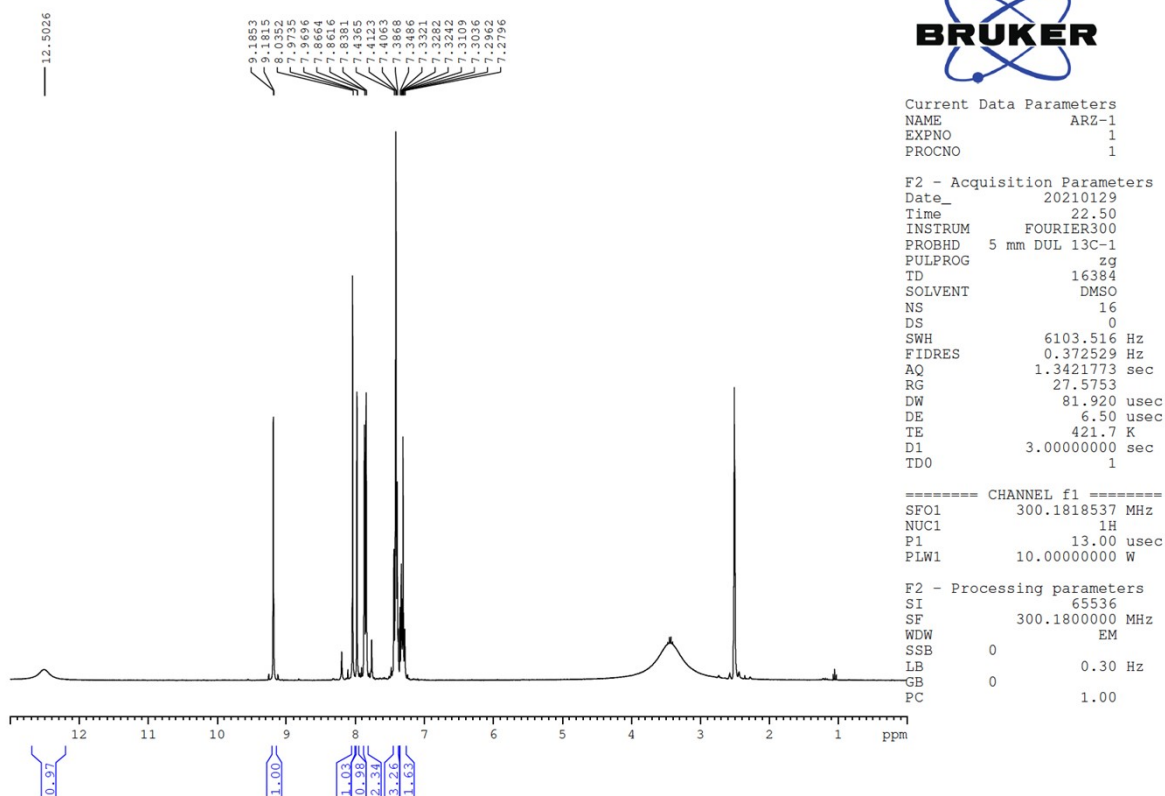

Figure S2. Compound 2a <sup>1</sup>H-NMR spectrum

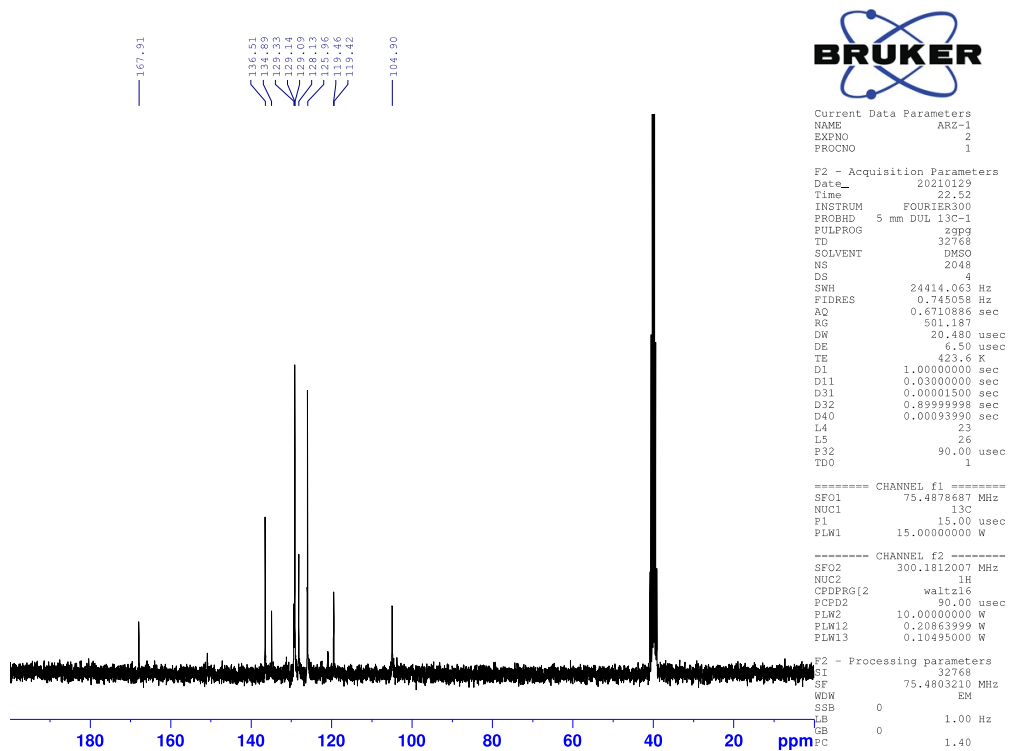

Figure S3. Compound 2a <sup>13</sup>C-NMR spectrum

Data File: C:\LabSolutions\Data\Analiz\derya\ARZ-2\_120.lcd

| Elmt | Val. | Min | Max | Use Adduct |
|------|------|-----|-----|------|------|-----|-----|------|------|-----|-----|------|------|-----|-----|------------|
| H    | 1    | 10  | 40  | O    | 2    | 0   | 4   | S    | 2    | 1   | 2   | Ru   | 2    | 0   | 0   | H          |
| C    | 4    | 10  | 40  | F    | 1    | 0   | 0   | Cl   | 1    | 0   | 0   | Pd   | 2    | 0   | 0   |            |
| N    | 3    | 3   | 5   | P    | 3    | 0   | 0   | Br   | 1    | 0   | 0   | I    | 3    | 0   | 0   |            |

Error Margin (ppm): 10  
 HC Ratio: unlimited  
 Max Isotopes: 3  
 MSn Iso RI (%): 10.00

DBE Range: 5.0 - 25.0  
 Apply N Rule: yes  
 Isotope RI (%): 1.00  
 MSn Logic Mode: AND

Electron Ions: both  
 Use MSn Info: yes  
 Isotope Res: 9000  
 Max Results: 150

Event#: 1 MS(E+) Ret. Time : 3.173 Scan# : 477

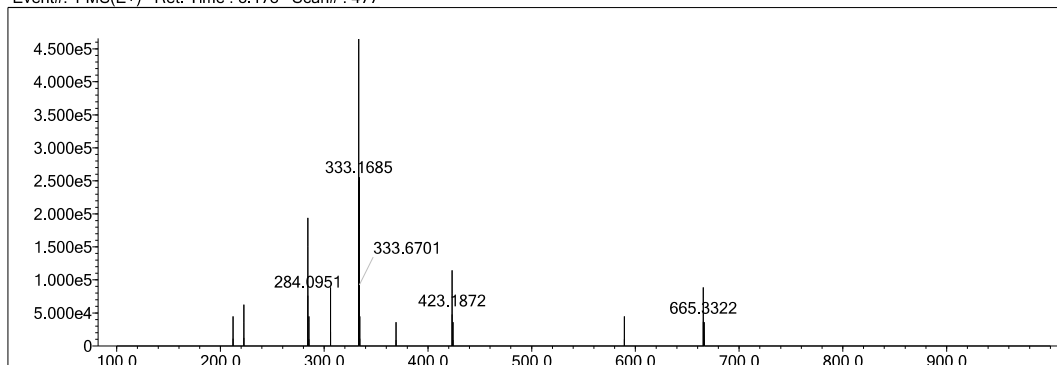

Measured region for 284.0951 m/z

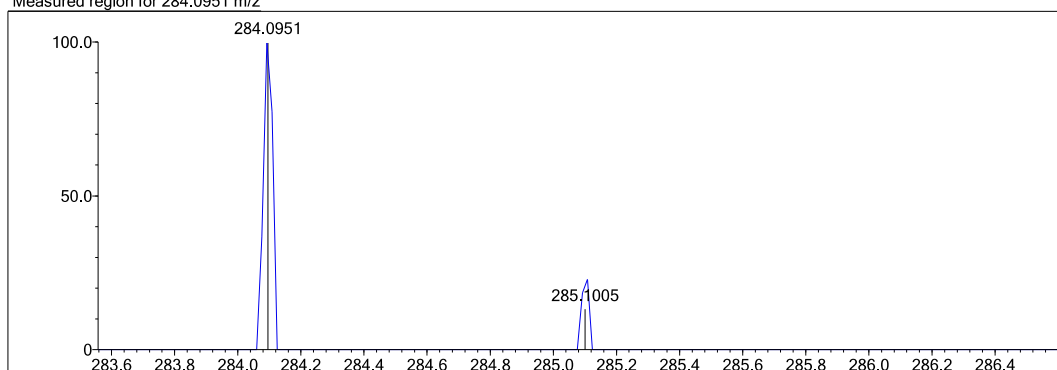

C14 H13 N5 S [M+H]<sup>+</sup>: Predicted region for 284.0964 m/z

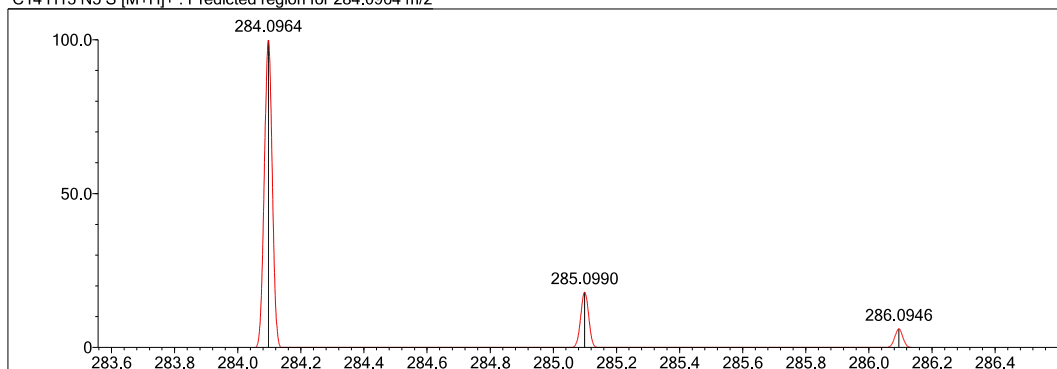

| Rank | Score | Formula (M)  | Ion                | Meas. m/z | Pred. m/z | Df. (mDa) | Df. (ppm) | Iso   | DBE  |
|------|-------|--------------|--------------------|-----------|-----------|-----------|-----------|-------|------|
| 1    | 56.74 | C14 H13 N5 S | [M+H] <sup>+</sup> | 284.0951  | 284.0964  | -1.3      | -4.58     | 62.32 | 11.0 |

Figure S4. Compound 2b HRMS report

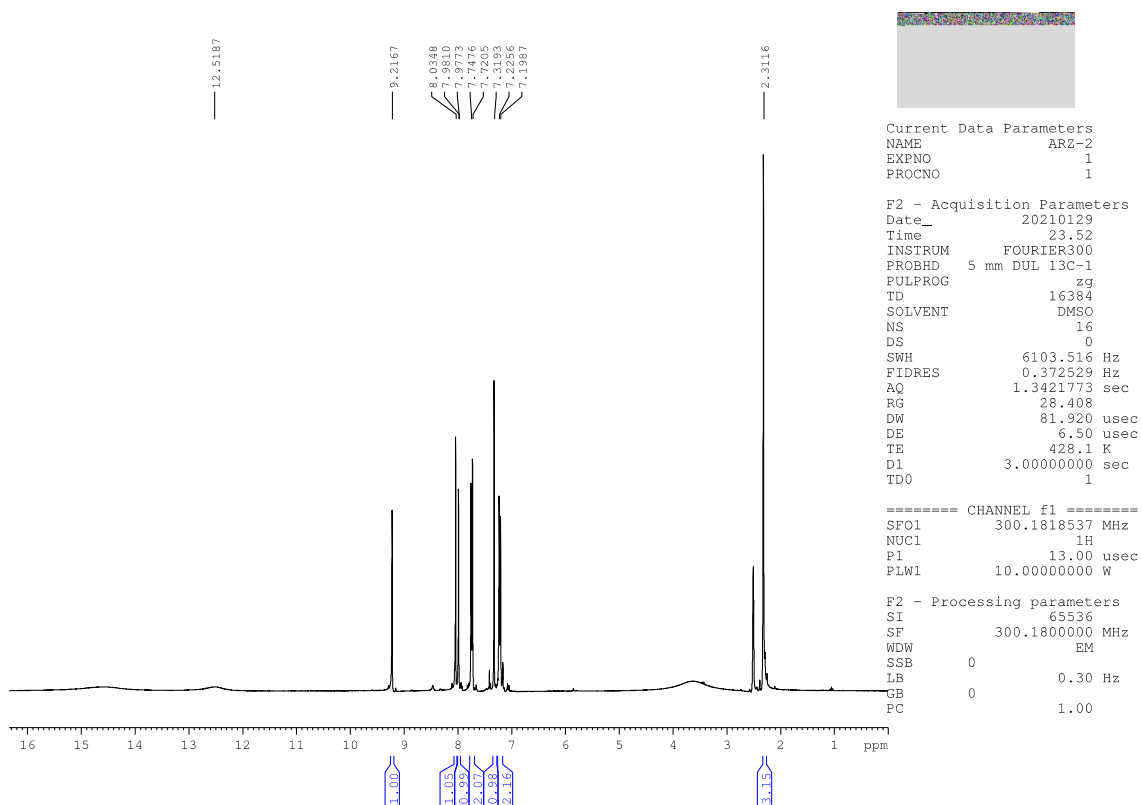

Figure S5. Compound 2b <sup>1</sup>H-NMR spectrum

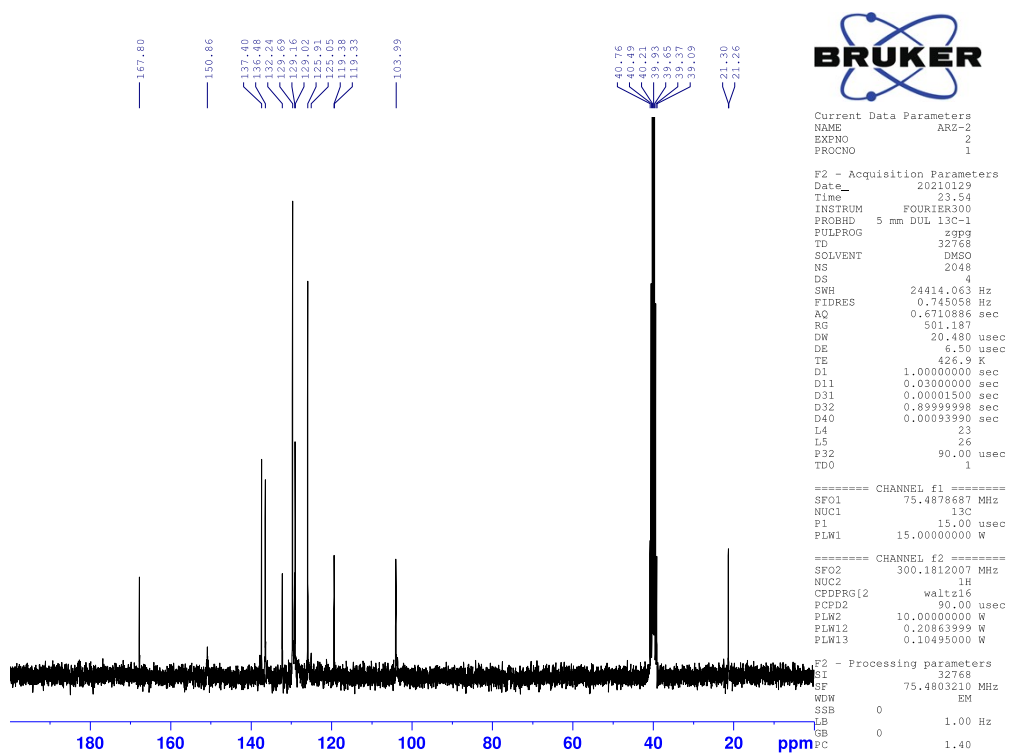

Figure S6. Compound 2b <sup>13</sup>C-NMR spectrum

Data File: C:\LabSolutions\Data\Analiz\derya\ARZ-3\_121.lcd

| Elmt | Val. | Min | Max | Use Adduct |
|------|------|-----|-----|------|------|-----|-----|------|------|-----|-----|------|------|-----|-----|------------|
| H    | 1    | 10  | 40  | O    | 2    | 0   | 4   | S    | 2    | 1   | 2   | Ru   | 2    | 0   | 0   | H          |
| C    | 4    | 10  | 40  | F    | 1    | 0   | 0   | Cl   | 1    | 0   | 0   | Pd   | 2    | 0   | 0   |            |
| N    | 3    | 3   | 5   | P    | 3    | 0   | 0   | Br   | 1    | 0   | 0   | I    | 3    | 0   | 0   |            |

Error Margin (ppm): 5  
 HC Ratio: unlimited  
 Max Isotopes: 3  
 MSn Iso RI (%): 10.00

DBE Range: 5.0 - 25.0  
 Apply N Rule: yes  
 Isotope RI (%): 1.00  
 MSn Logic Mode: AND

Electron Ions: both  
 Use MSn Info: yes  
 Isotope Res: 9000  
 Max Results: 150

Event#: 1 MS(E+) Ret. Time : 3.040 -> 3.160 Scan# : 457 -> 475

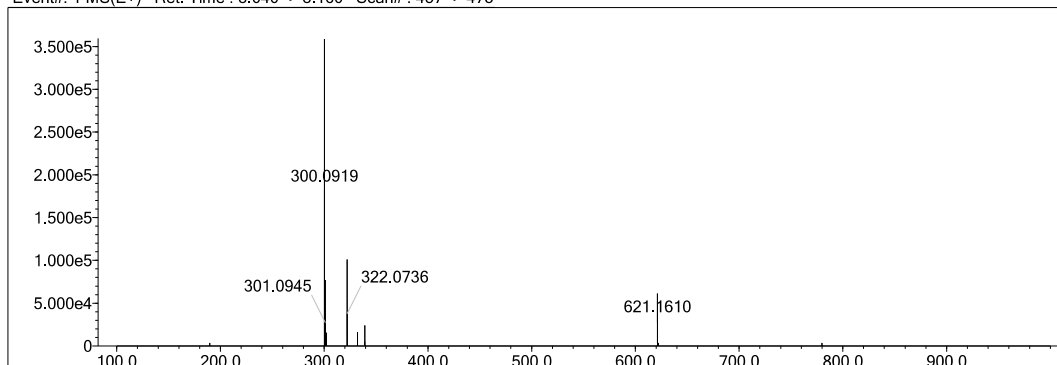

Measured region for 300.0919 m/z

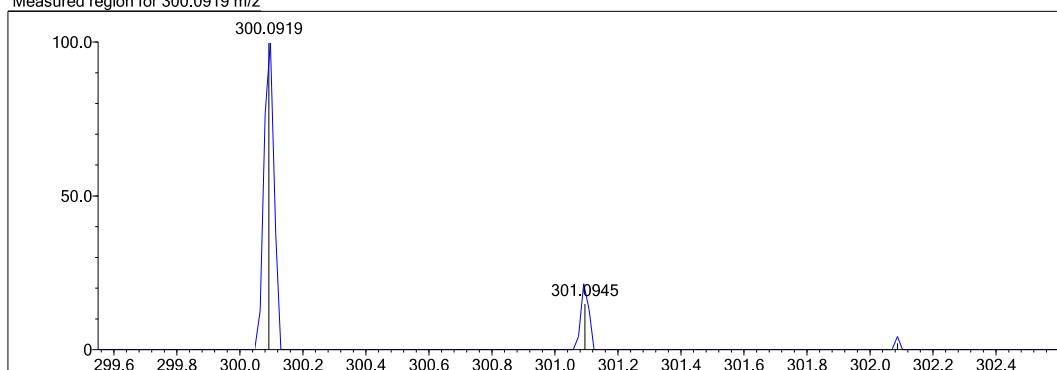

C14 H13 N5 O S [M+H]<sup>+</sup> : Predicted region for 300.0914 m/z

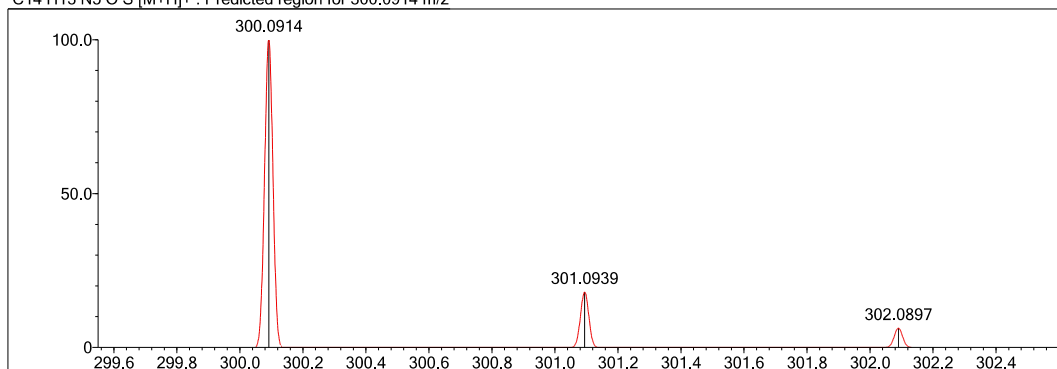

| Rank | Score | Formula (M)    | Ion                | Meas. m/z | Pred. m/z | Df. (mDa) | Df. (ppm) | Iso   | DBE  |
|------|-------|----------------|--------------------|-----------|-----------|-----------|-----------|-------|------|
| 1    | 72.00 | C14 H13 N5 O S | [M+H] <sup>+</sup> | 300.0919  | 300.0914  | 0.5       | 1.67      | 73.23 | 11.0 |

Figure S7. Compound 2c HRMS report

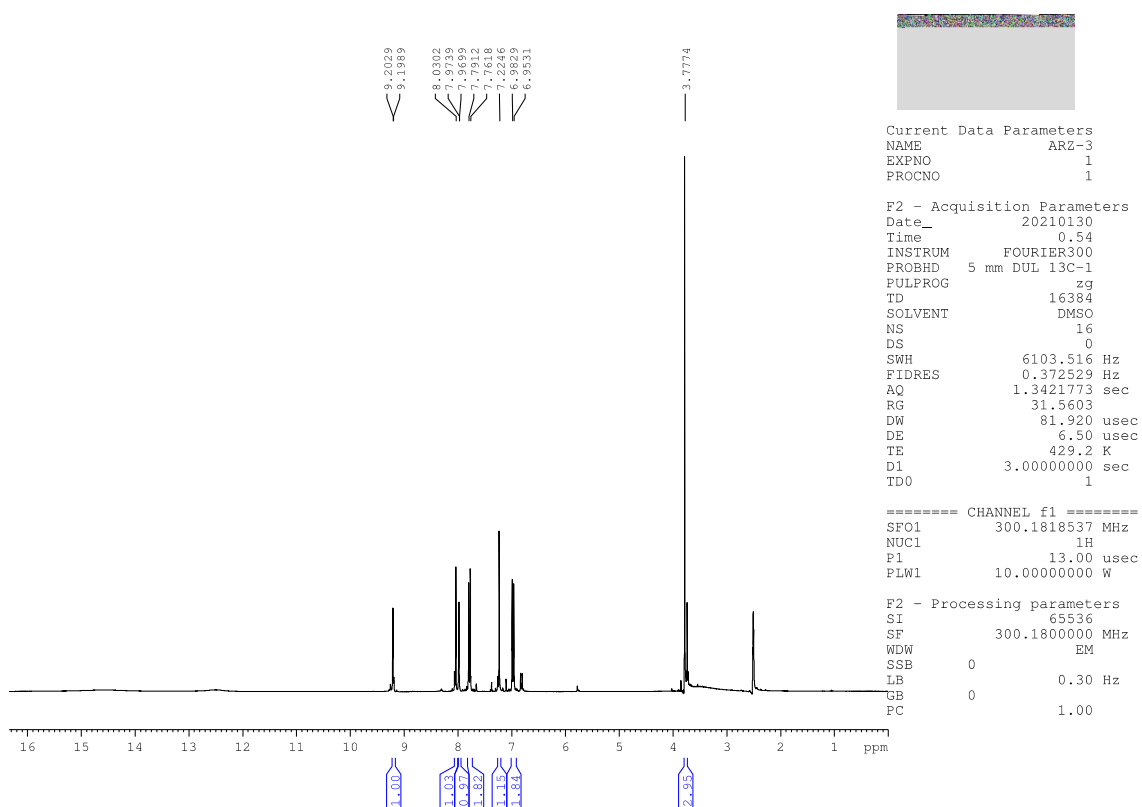

Figure S8. Compound 2c <sup>1</sup>H-NMR spectrum

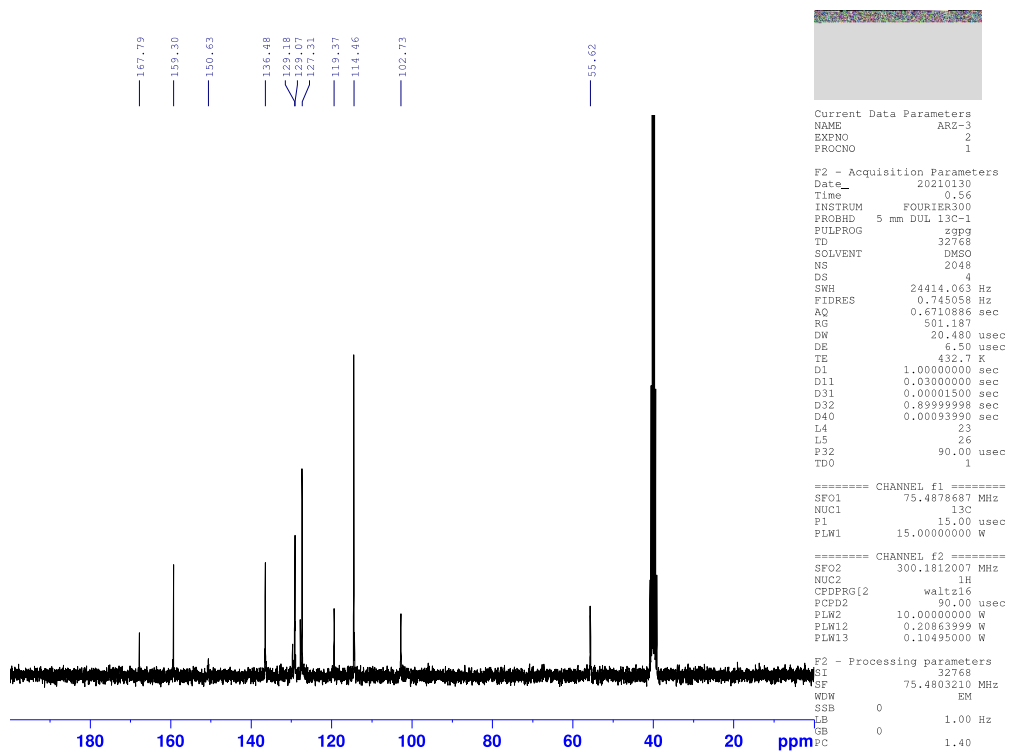

Figure S9. Compound 2c <sup>13</sup>C-NMR spectrum

Data File: C:\LabSolutions\Data\Analiz\derya\ARZ-4\_122.lcd

| Elmt | Val. | Min | Max | Use Adduct |
|------|------|-----|-----|------|------|-----|-----|------|------|-----|-----|------|------|-----|-----|------------|
| H    | 1    | 10  | 40  | O    | 2    | 0   | 4   | S    | 2    | 1   | 2   | Ru   | 2    | 0   | 0   | H          |
| C    | 4    | 10  | 40  | F    | 1    | 0   | 0   | Cl   | 1    | 0   | 0   | Pd   | 2    | 0   | 0   |            |
| N    | 3    | 3   | 6   | P    | 3    | 0   | 0   | Br   | 1    | 0   | 0   | I    | 3    | 0   | 0   |            |

Error Margin (ppm): 5  
 DBE Range: 5.0 - 25.0  
 Electron Ions: both  
 HC Ratio: unlimited  
 Apply N Rule: yes  
 Use MSn Info: yes  
 Max Isotopes: 3  
 Isotope RI (%): 1.00  
 MSn Iso RI (%): 10.00  
 MSn Logic Mode: AND  
 Max Results: 150

Event#: 1 MS(E+) Ret. Time : 2.973 -> 3.080 Scan# : 447 -> 463

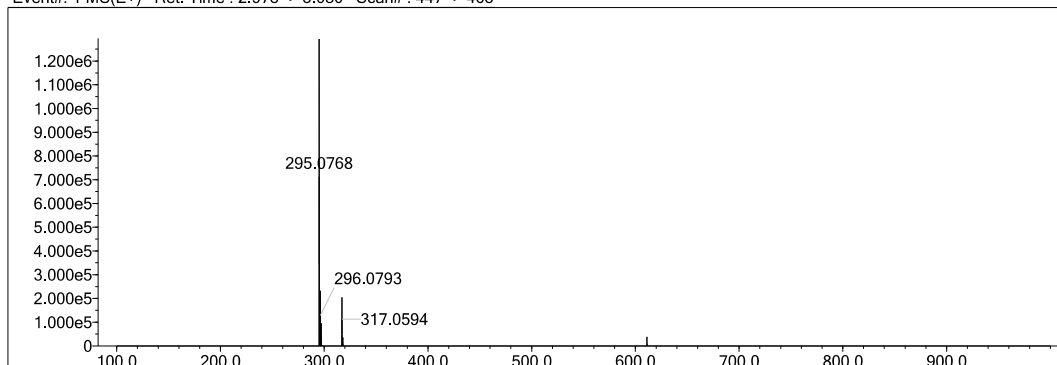

Measured region for 295.0768 m/z

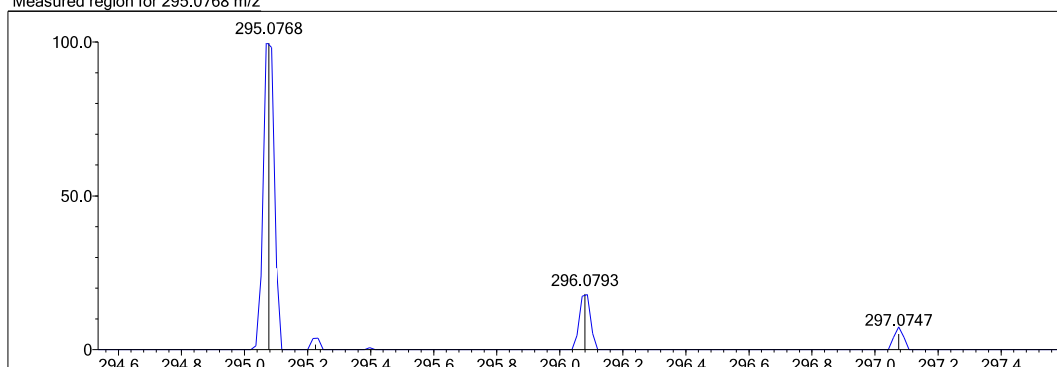

C14 H10 N6 S [M+H]<sup>+</sup> : Predicted region for 295.0760 m/z

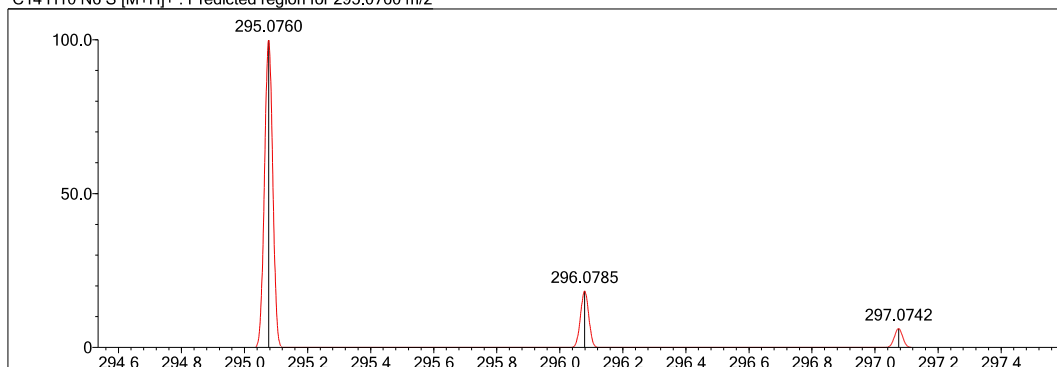

| Rank | Score | Formula (M)  | Ion                | Meas. m/z | Pred. m/z | Df. (mDa) | Df. (ppm) | Iso    | DBE  |
|------|-------|--------------|--------------------|-----------|-----------|-----------|-----------|--------|------|
| 1    | 95.72 | C14 H10 N6 S | [M+H] <sup>+</sup> | 295.0768  | 295.0760  | 0.8       | 2.71      | 100.00 | 13.0 |

Figure S10. Compound 2d HRMS report

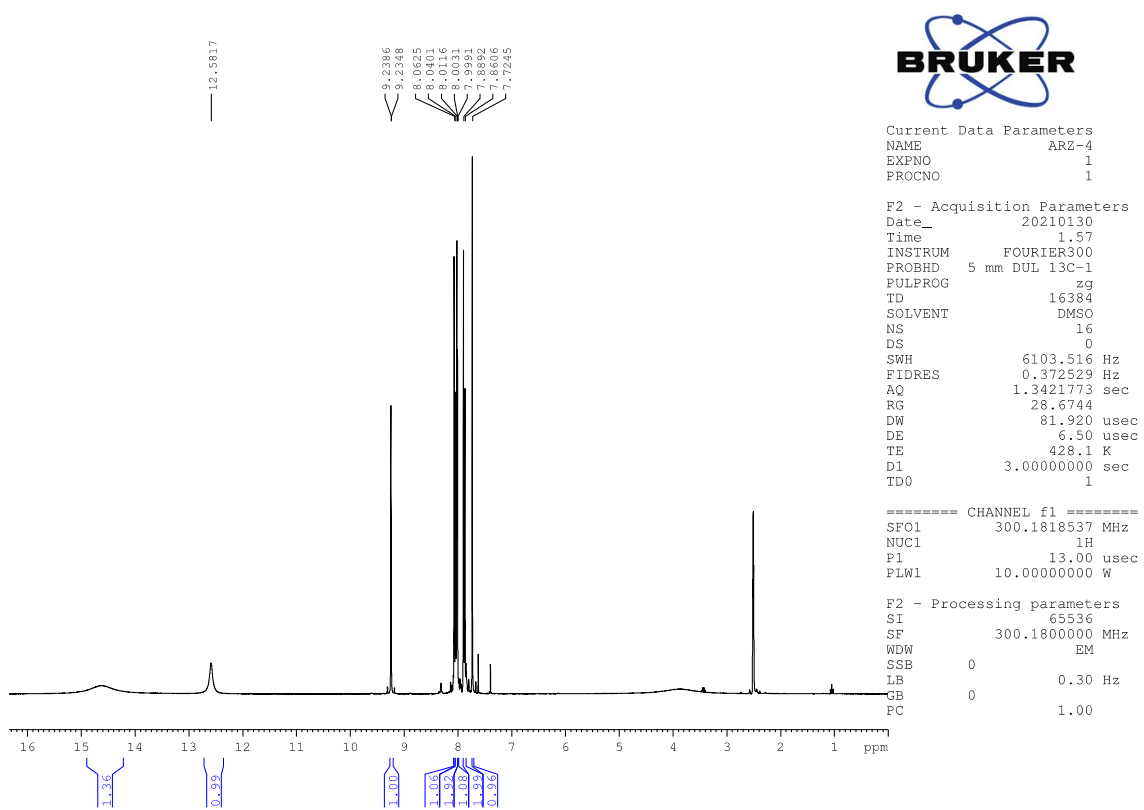

Figure S11. Compound 2d <sup>1</sup>H-NMR spectrum

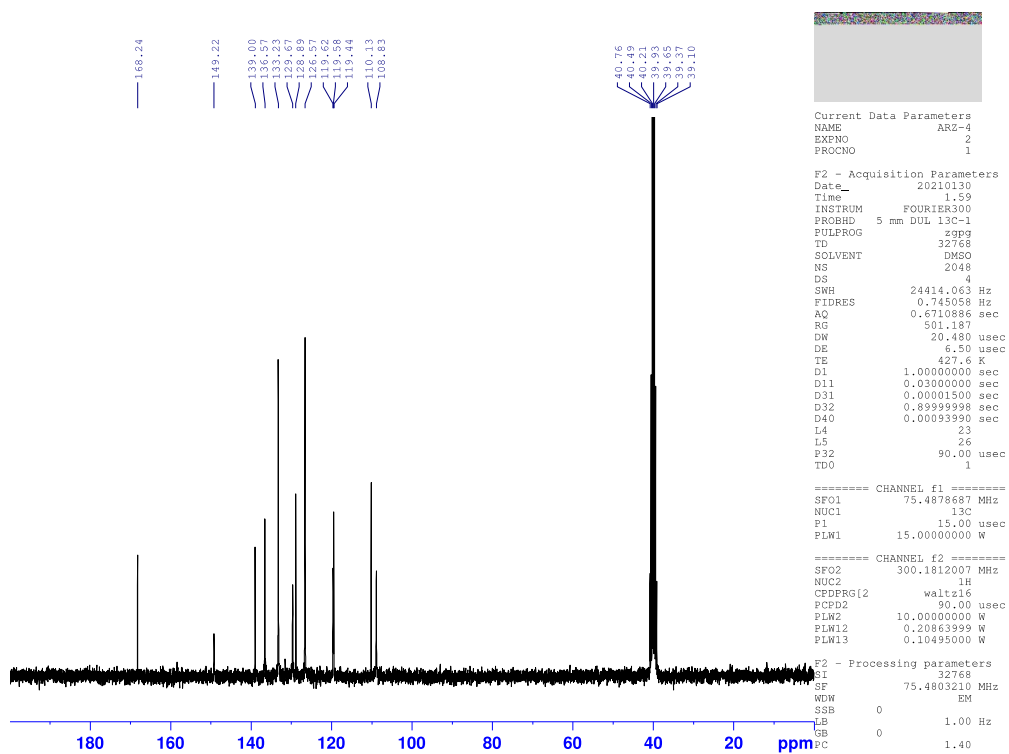

Figure S12. Compound 2d <sup>13</sup>C-NMR spectrum



Data File: C:\LabSolutions\Data\Analiz\derya\ARZ-5\_123.lcd

| Elmt | Val. | Min | Max | Use Adduct |
|------|------|-----|-----|------|------|-----|-----|------|------|-----|-----|------|------|-----|-----|------------|
| H    | 1    | 10  | 40  | O    | 2    | 0   | 4   | S    | 2    | 1   | 2   | Ru   | 2    | 0   | 0   | H          |
| C    | 4    | 10  | 40  | F    | 1    | 0   | 0   | Cl   | 1    | 0   | 0   | Pd   | 2    | 0   | 0   |            |
| N    | 3    | 3   | 6   | P    | 3    | 0   | 0   | Br   | 1    | 0   | 0   | I    | 3    | 0   | 0   |            |

Error Margin (ppm): 5  
 DBE Range: 5.0 - 25.0  
 Electron Ions: both  
 HC Ratio: unlimited  
 Apply N Rule: yes  
 Use MSn Info: yes  
 Max Isotopes: 3  
 Isotope RI (%): 1.00  
 MSn Iso RI (%): 10.00  
 MSn Logic Mode: AND  
 Max Results: 150

Event#: 1 MS(E+) Ret. Time : 3.160 Scan# : 475

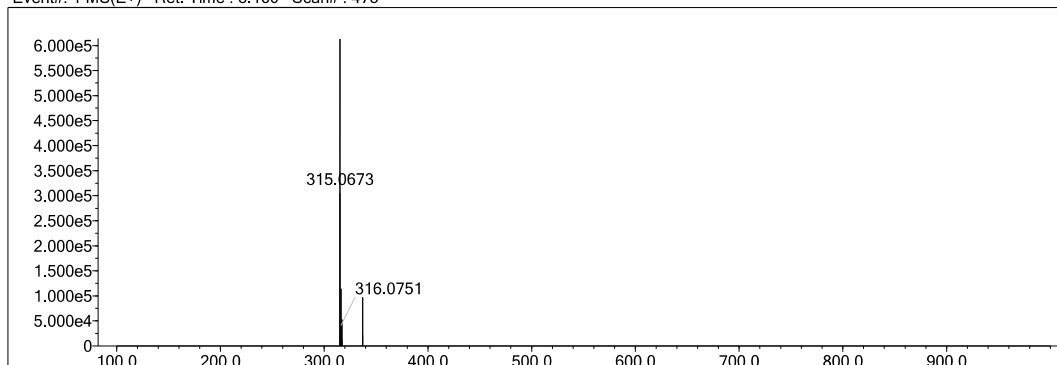

Measured region for 315.0673 m/z

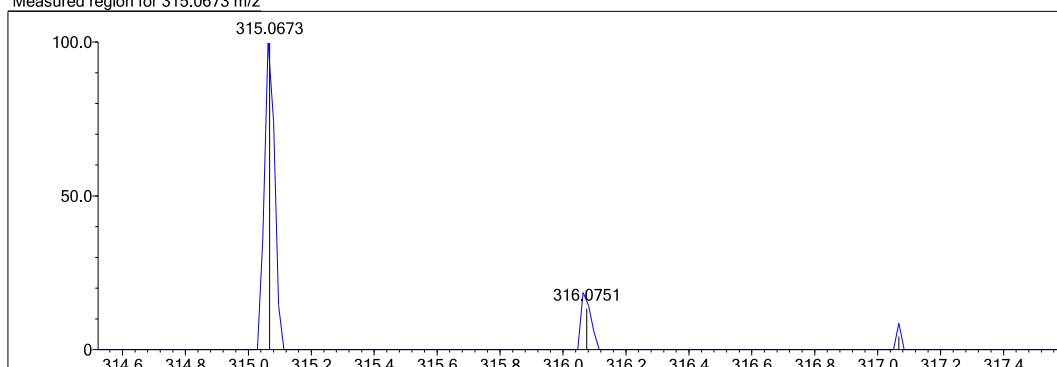

C13 H10 N6 O2 S [M+H]+ : Predicted region for 315.0659 m/z

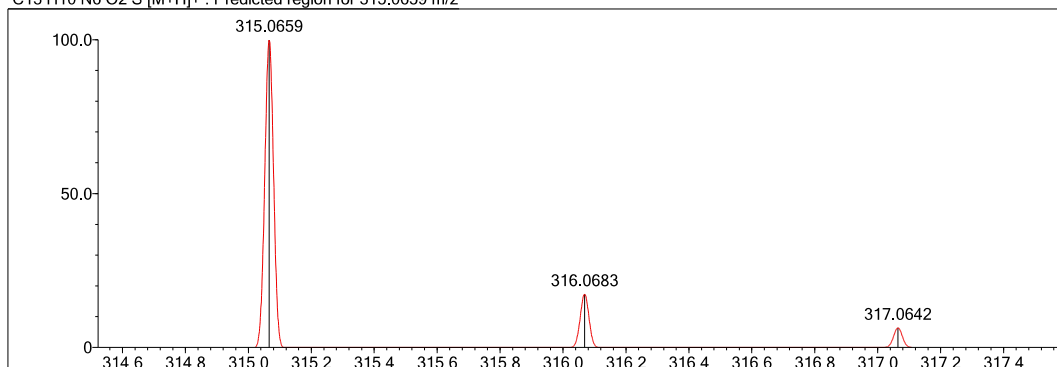

| Rank | Score | Formula (M)     | Ion    | Meas. m/z | Pred. m/z | Df. (mDa) | Df. (ppm) | Iso   | DBE  |
|------|-------|-----------------|--------|-----------|-----------|-----------|-----------|-------|------|
| 1    | 64.79 | C13 H10 N6 O2 S | [M+H]+ | 315.0673  | 315.0659  | 1.4       | 4.44      | 70.89 | 12.0 |

Figure S13. Compound 2e HRMS report

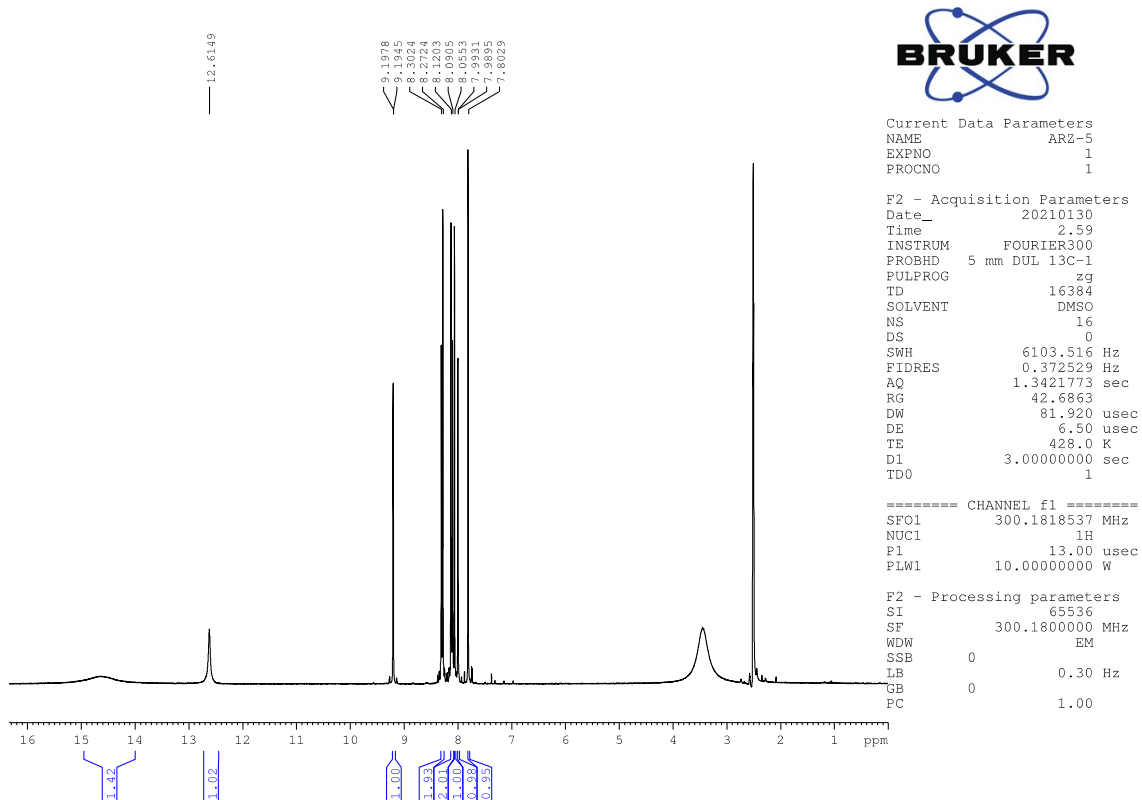

Figure S14. Compound 2e <sup>1</sup>H-NMR spectrum

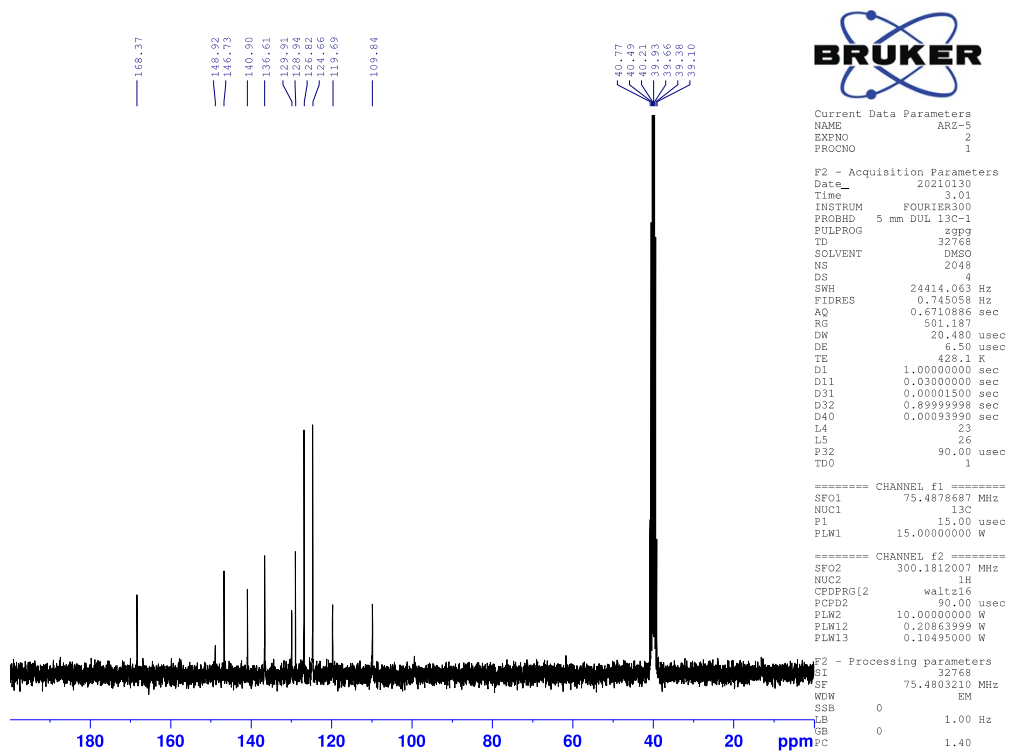

Figure S15. Compound 2e <sup>13</sup>C-NMR spectrum

Data File: C:\LabSolutions\Data\Analiz\derya\ARZ-6\_124.lcd

| Elmt | Val. | Min | Max | Use Adduct |
|------|------|-----|-----|------|------|-----|-----|------|------|-----|-----|------|------|-----|-----|------------|
| H    | 1    | 10  | 40  | O    | 2    | 0   | 4   | S    | 2    | 1   | 2   | Ru   | 2    | 0   | 0   | H          |
| C    | 4    | 10  | 40  | F    | 1    | 0   | 1   | Cl   | 1    | 0   | 0   | Pd   | 2    | 0   | 0   |            |
| N    | 3    | 3   | 6   | P    | 3    | 0   | 0   | Br   | 1    | 0   | 0   | I    | 3    | 0   | 0   |            |

Error Margin (ppm): 5  
 DBE Range: 5.0 - 25.0  
 Electron Ions: both  
 HC Ratio: unlimited  
 Apply N Rule: yes  
 Use MSn Info: yes  
 Max Isotopes: 3  
 Isotope RI (%): 1.00  
 MSn Iso RI (%): 10.00  
 MSn Logic Mode: AND  
 Max Results: 150

Event#: 1 MS(E+) Ret. Time : 3.173 Scan# : 477

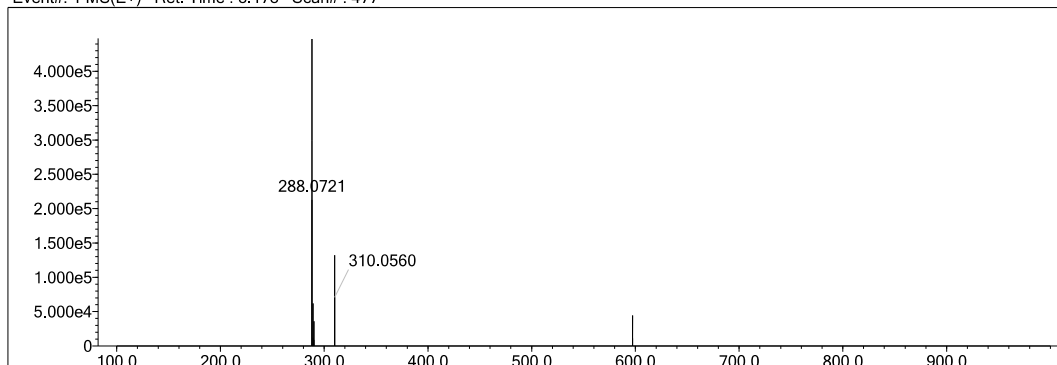

Measured region for 288.0721 m/z

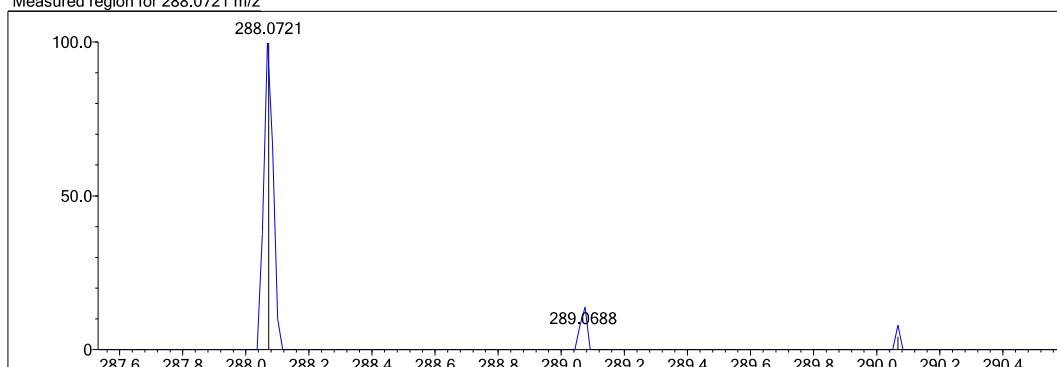

C13 H10 N5 F S [M+H]+ : Predicted region for 288.0714 m/z

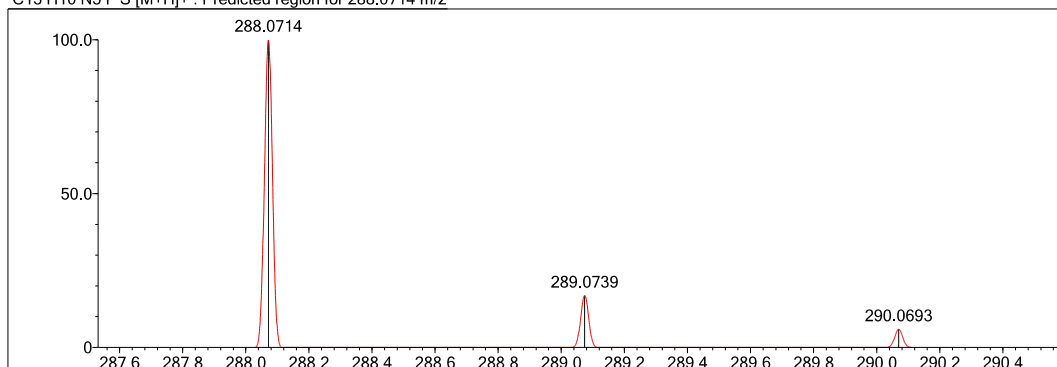

| Rank | Score | Formula (M)    | Ion                | Meas. m/z | Pred. m/z | Df. (mDa) | Df. (ppm) | Iso   | DBE  |
|------|-------|----------------|--------------------|-----------|-----------|-----------|-----------|-------|------|
| 1    | 67.92 | C13 H10 N5 F S | [M+H] <sup>+</sup> | 288.0721  | 288.0714  | 0.7       | 2.43      | 70.44 | 11.0 |

Figure S16. Compound 2f HRMS report

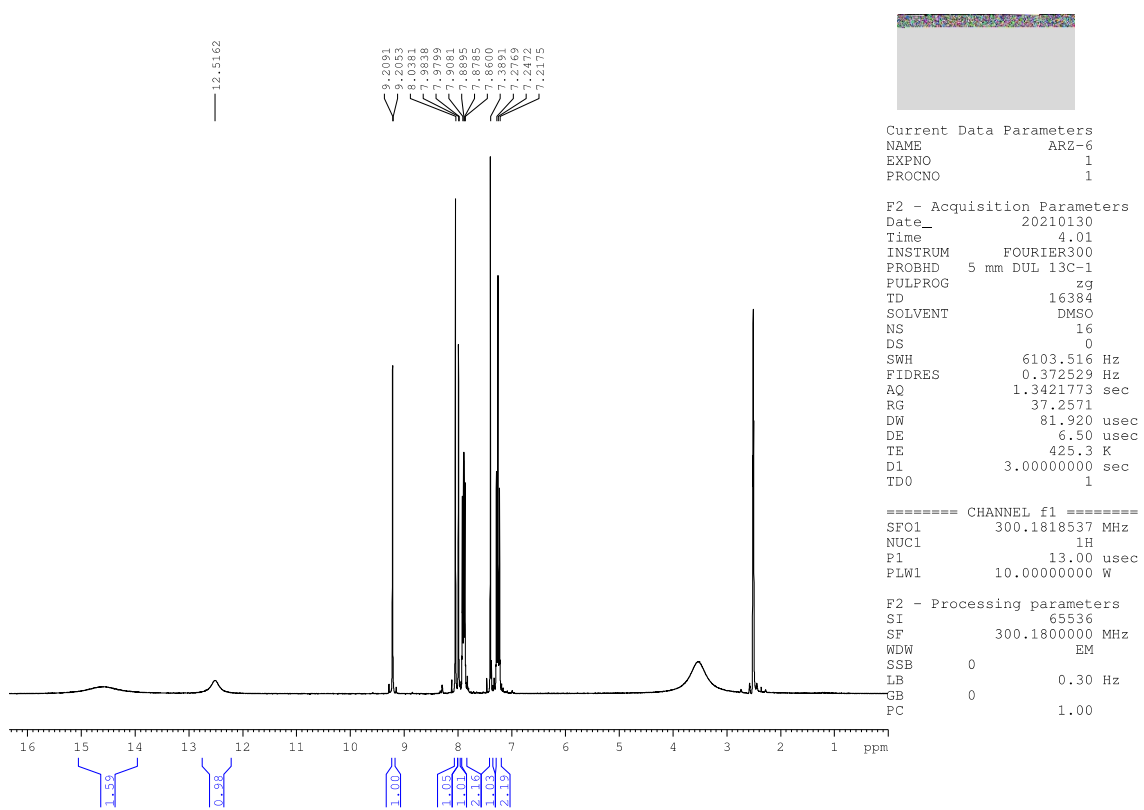

Figure S17. Compound 2f <sup>1</sup>H-NMR spectrum

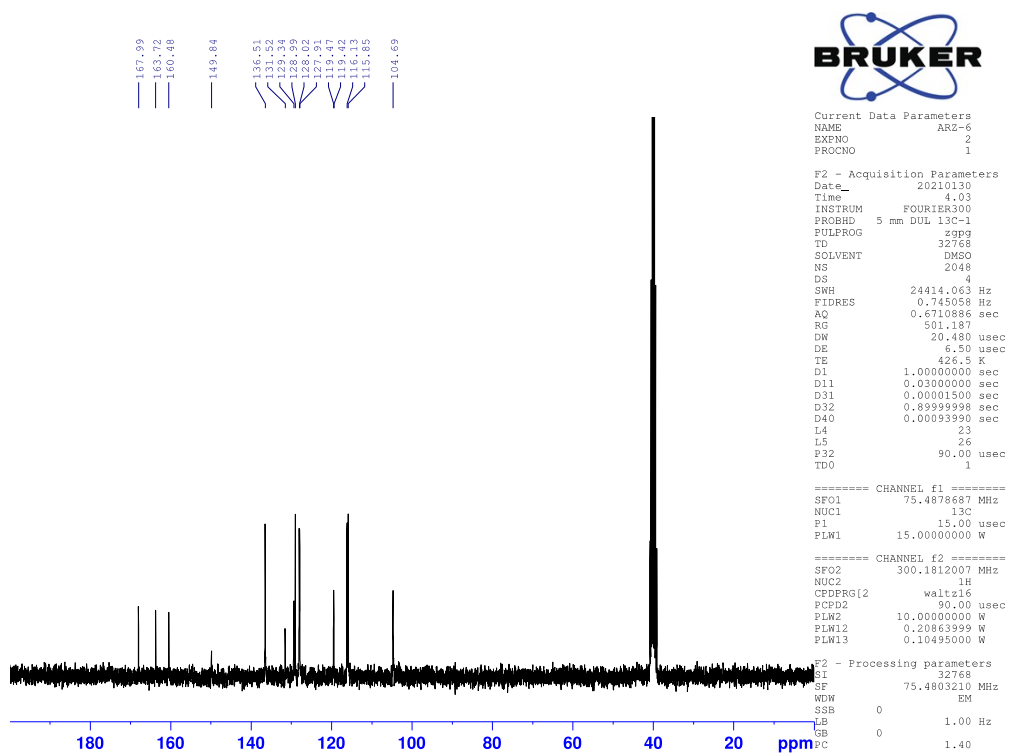

Figure S18. Compound 2f <sup>13</sup>C-NMR spectrum

Data File: C:\LabSolutions\Data\Analiz\derya\ARZ-7\_125.lcd

| Elmt | Val. | Min | Max | Use Adduct |
|------|------|-----|-----|------|------|-----|-----|------|------|-----|-----|------|------|-----|-----|------------|
| H    | 1    | 10  | 40  | O    | 2    | 0   | 4   | S    | 2    | 1   | 2   | Ru   | 2    | 0   | 0   | H          |
| C    | 4    | 10  | 40  | F    | 1    | 0   | 1   | Cl   | 1    | 0   | 1   | Pd   | 2    | 0   | 0   |            |
| N    | 3    | 3   | 6   | P    | 3    | 0   | 0   | Br   | 1    | 0   | 0   | I    | 3    | 0   | 0   |            |

Error Margin (ppm): 5  
 HC Ratio: unlimited  
 Max Isotopes: 3  
 MSn Iso RI (%): 10.00

DBE Range: 8.0 - 25.0  
 Apply N Rule: yes  
 Isotope RI (%): 1.00  
 MSn Logic Mode: AND

Electron Ions: both  
 Use MSn Info: yes  
 Isotope Res: 9000  
 Max Results: 150

Event#: 1 MS(E+) Ret. Time : 3.440 -> 3.453 Scan# : 517 -> 519

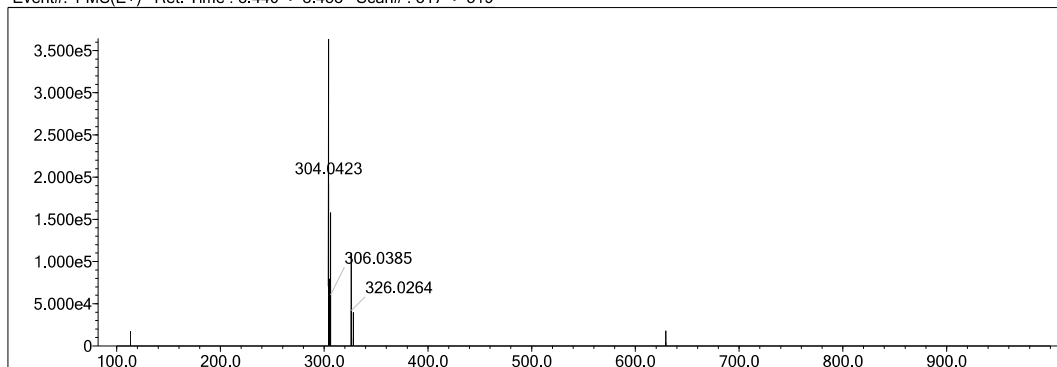

Measured region for 304.0423 m/z

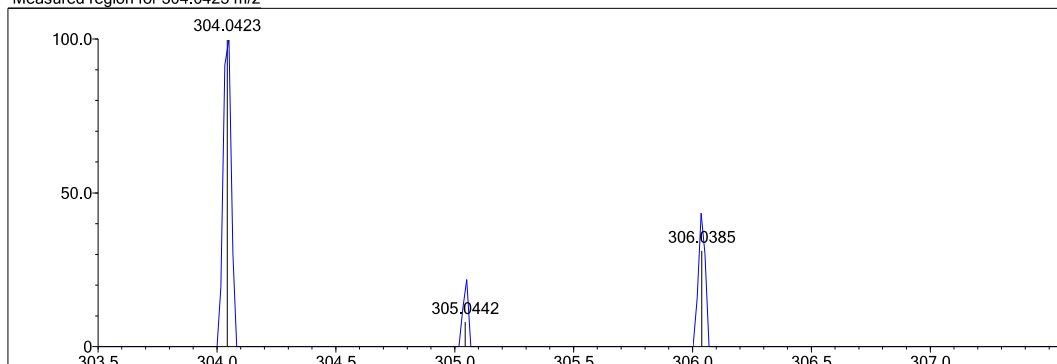

C13 H10 N5 S Cl [M+H]<sup>+</sup> : Predicted region for 304.0418 m/z

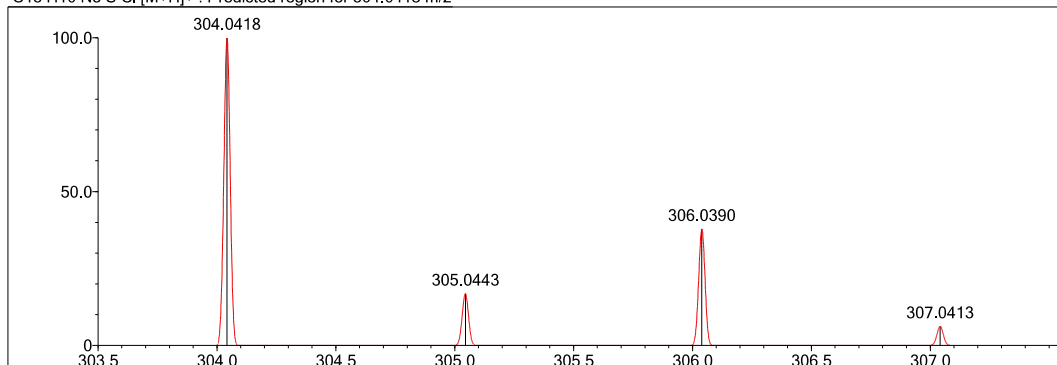

| Rank | Score | Formula (M)     | Ion                | Meas. m/z | Pred. m/z | Df. (mDa) | Df. (ppm) | Iso   | DBE  |
|------|-------|-----------------|--------------------|-----------|-----------|-----------|-----------|-------|------|
| 1    | 79.56 | C13 H10 N5 S Cl | [M+H] <sup>+</sup> | 304.0423  | 304.0418  | 0.5       | 1.64      | 80.85 | 11.0 |

Figure S19. Compound 2g HRMS report

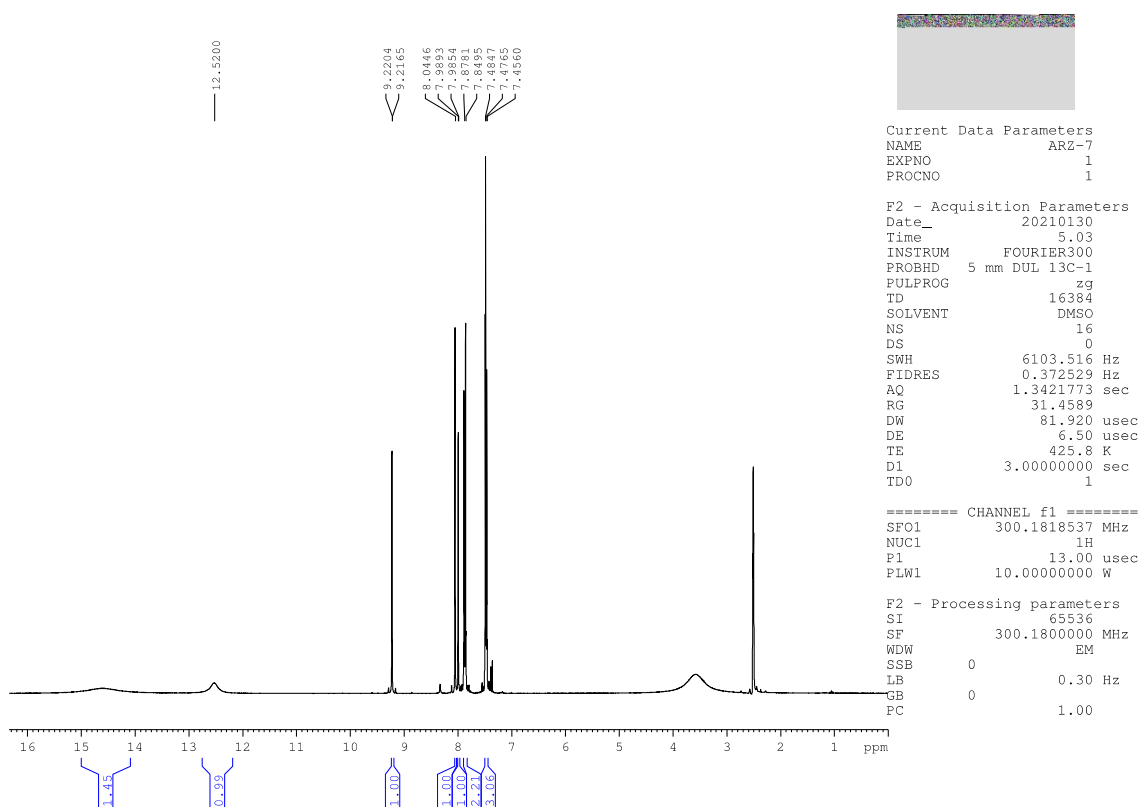

Figure S20. Compound 2g <sup>1</sup>H-NMR spectrum

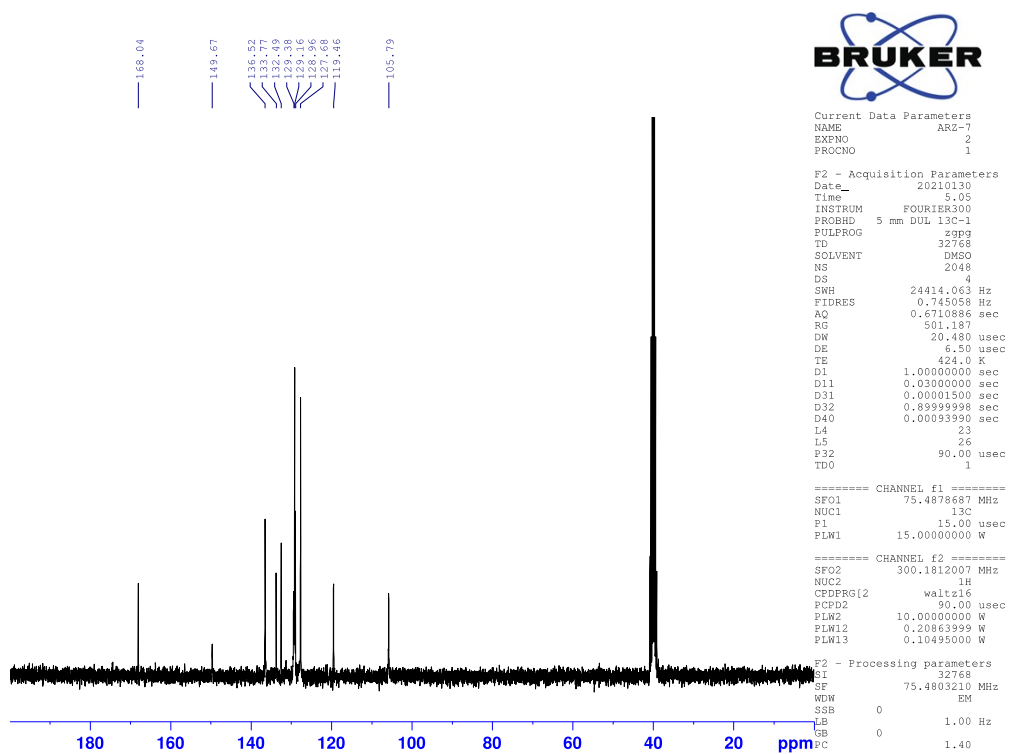

Figure S21. Compound 2g <sup>13</sup>C-NMR spectrum

Data File: C:\LabSolutions\Data\Analiz\derya\ARZ-8\_126.lcd

| Elmt | Val. | Min | Max | Use Adduct |
|------|------|-----|-----|------|------|-----|-----|------|------|-----|-----|------|------|-----|-----|------------|
| H    | 1    | 10  | 40  | O    | 2    | 0   | 4   | S    | 2    | 1   | 2   | Ru   | 2    | 0   | 0   | H          |
| C    | 4    | 10  | 40  | F    | 1    | 0   | 1   | Cl   | 1    | 0   | 1   | Pd   | 2    | 0   | 0   |            |
| N    | 3    | 3   | 6   | P    | 3    | 0   | 0   | Br   | 1    | 0   | 1   | I    | 3    | 0   | 0   |            |

Error Margin (ppm): 5  
 DBE Range: 8.0 - 25.0  
 Electron Ions: both  
 HC Ratio: unlimited  
 Apply N Rule: yes  
 Use MSn Info: yes  
 Max Isotopes: 3  
 Isotope RI (%): 1.00  
 MSn Iso RI (%): 10.00  
 MSn Logic Mode: AND  
 Max Results: 150

Event#: 1 MS(E+) Ret. Time : 3.480 -> 3.587 Scan# : 523 -> 539

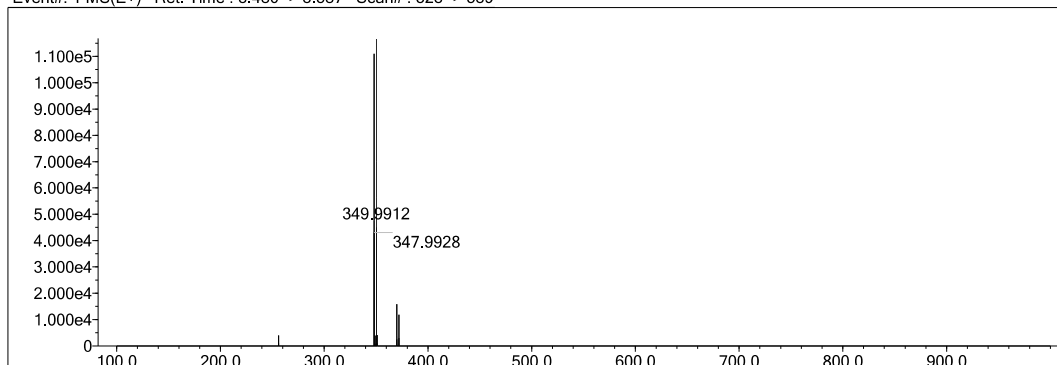

Measured region for 347.9928 m/z

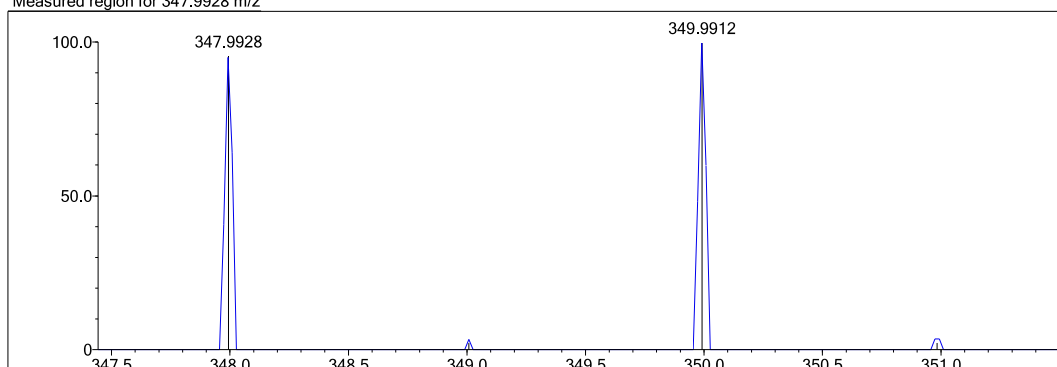

C13 H10 N5 S Br [M+H]<sup>+</sup> : Predicted region for 347.9913 m/z

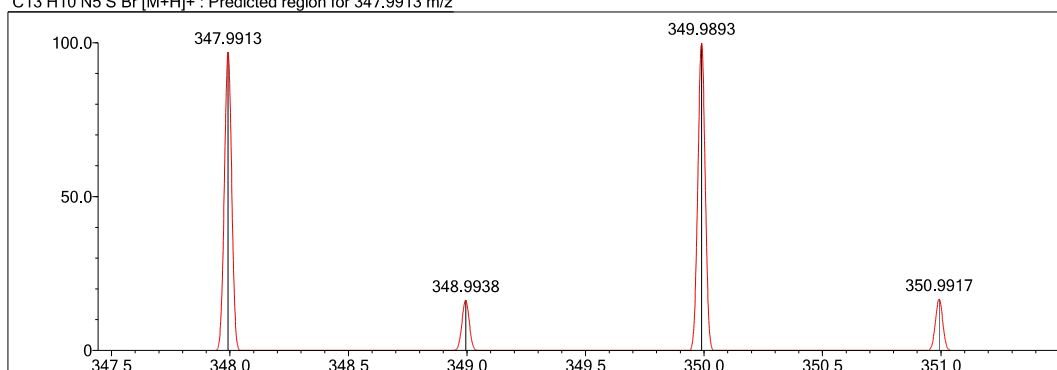

| Rank | Score | Formula (M)     | Ion                | Meas. m/z | Pred. m/z | Df. (mDa) | Df. (ppm) | Iso   | DBE  |
|------|-------|-----------------|--------------------|-----------|-----------|-----------|-----------|-------|------|
| 1    | 21.64 | C13 H10 N5 S Br | [M+H] <sup>+</sup> | 347.9928  | 347.9913  | 1.5       | 4.31      | 23.59 | 11.0 |

Figure S22. Compound 2h HRMS report

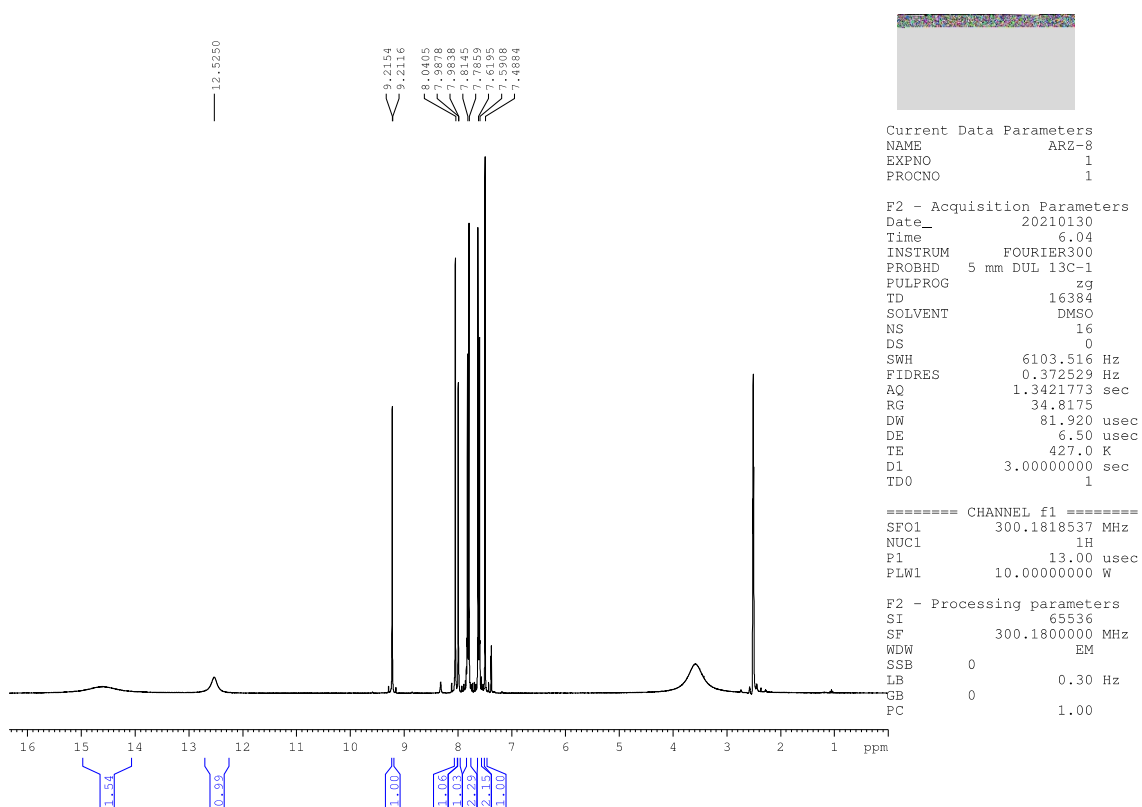

Figure S23. Compound 2h <sup>1</sup>H-NMR spectrum

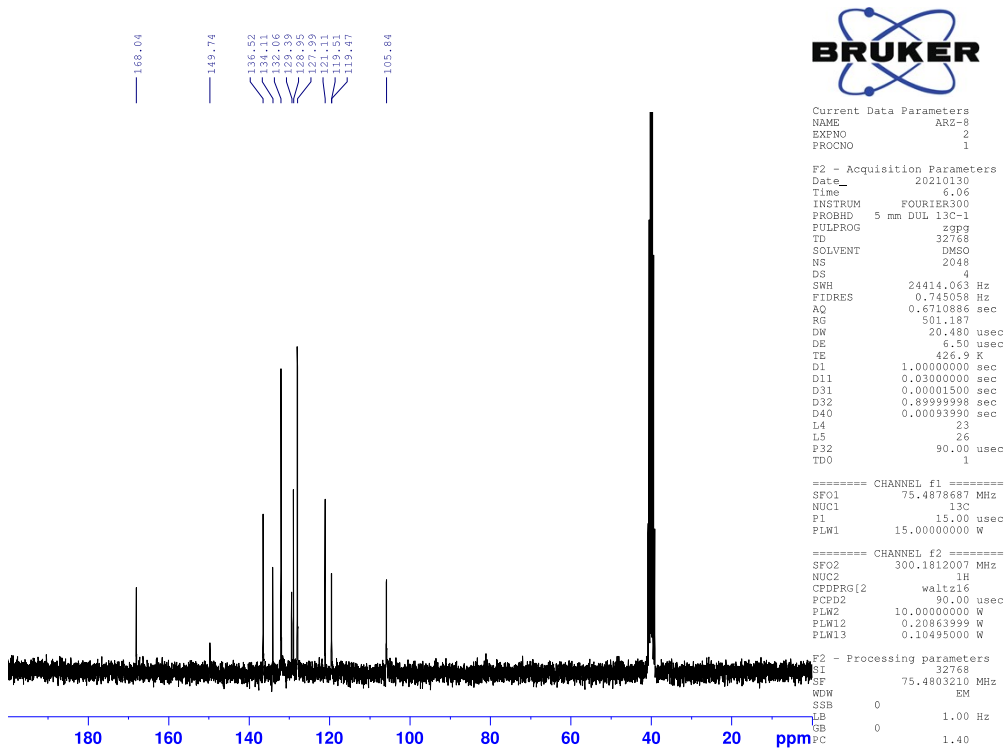

Figure S24. Compound 2h <sup>13</sup>C-NMR spectrum



Data File: C:\LabSolutions\Data\Analiz\derya\ARZ-9\_127.lcd

| Elmt | Val. | Min | Max | Use Adduct |
|------|------|-----|-----|------|------|-----|-----|------|------|-----|-----|------|------|-----|-----|------------|
| H    | 1    | 10  | 40  | O    | 2    | 0   | 4   | S    | 2    | 1   | 2   | Ru   | 2    | 0   | 0   | H          |
| C    | 4    | 10  | 40  | F    | 1    | 0   | 1   | Cl   | 1    | 0   | 1   | Pd   | 2    | 0   | 0   |            |
| N    | 3    | 3   | 6   | P    | 3    | 0   | 0   | Br   | 1    | 0   | 1   | I    | 3    | 0   | 0   |            |

Error Margin (ppm): 15  
 HC Ratio: unlimited  
 Max Isotopes: 3  
 MSn Iso RI (%): 10.00

DBE Range: 8.0 - 25.0  
 Apply N Rule: yes  
 Isotope RI (%): 1.00  
 MSn Logic Mode: AND

Electron Ions: both  
 Use MSn Info: yes  
 Isotope Res: 9000  
 Max Results: 150

Event#: 1 MS(E+) Ret. Time : 3.440 Scan# : 517

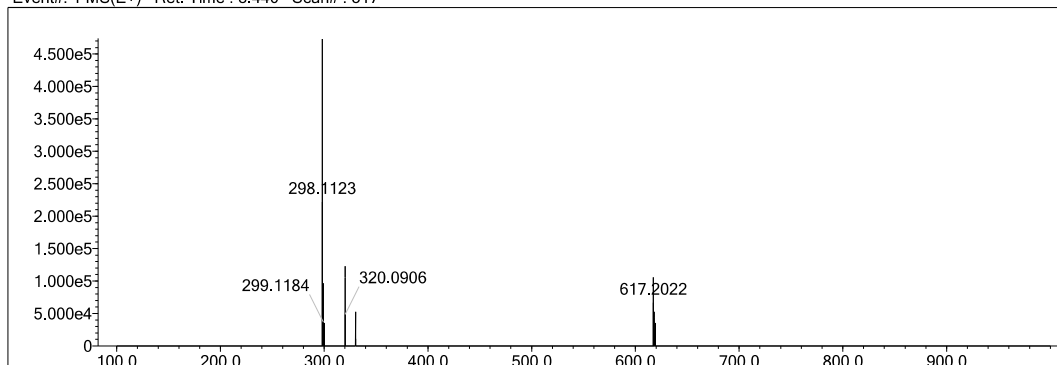

Measured region for 298.1123 m/z

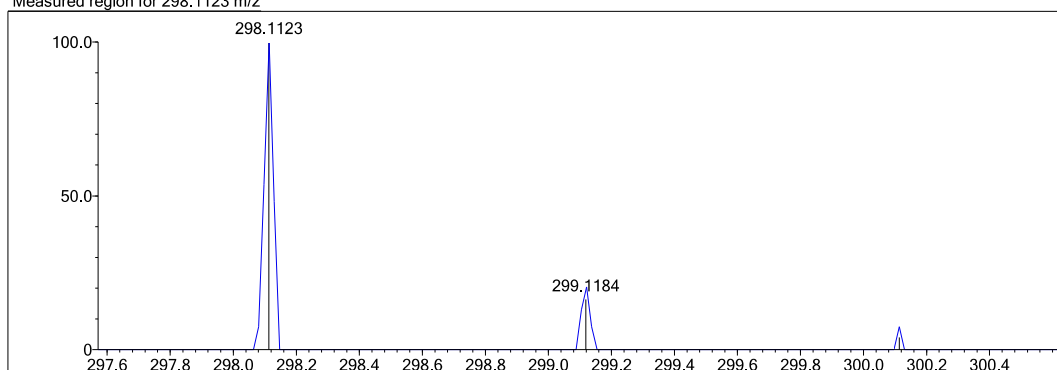

C15 H15 N5 S [M+H]<sup>+</sup>: Predicted region for 298.1121 m/z

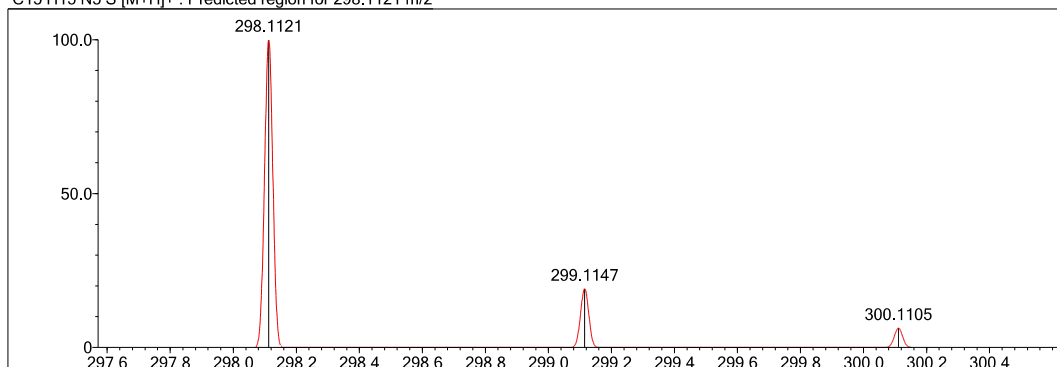

| Rank | Score | Formula (M)  | Ion                | Meas. m/z | Pred. m/z | Df. (mDa) | Df. (ppm) | Iso   | DBE  |
|------|-------|--------------|--------------------|-----------|-----------|-----------|-----------|-------|------|
| 1    | 87.13 | C15 H15 N5 S | [M+H] <sup>+</sup> | 298.1123  | 298.1121  | 0.2       | 0.67      | 87.13 | 11.0 |

Figure S25. Compound 2i HRMS report

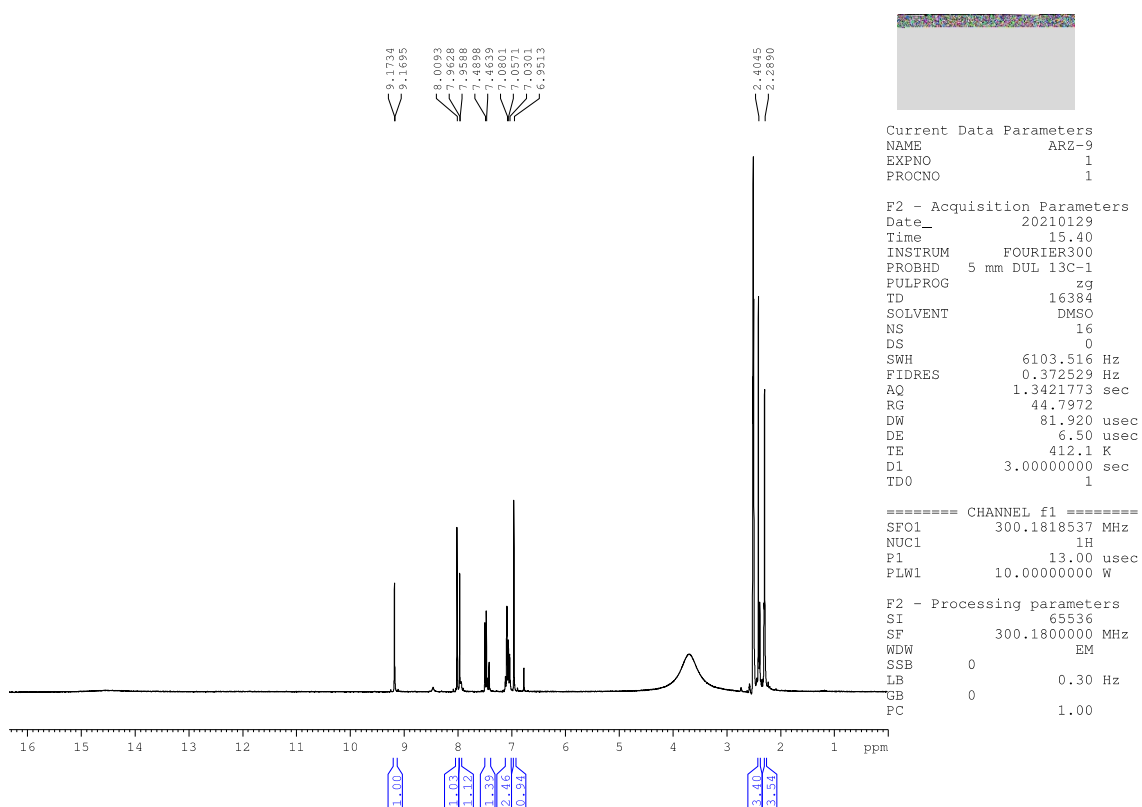

Figure S26. Compound 2i <sup>1</sup>H-NMR spectrum

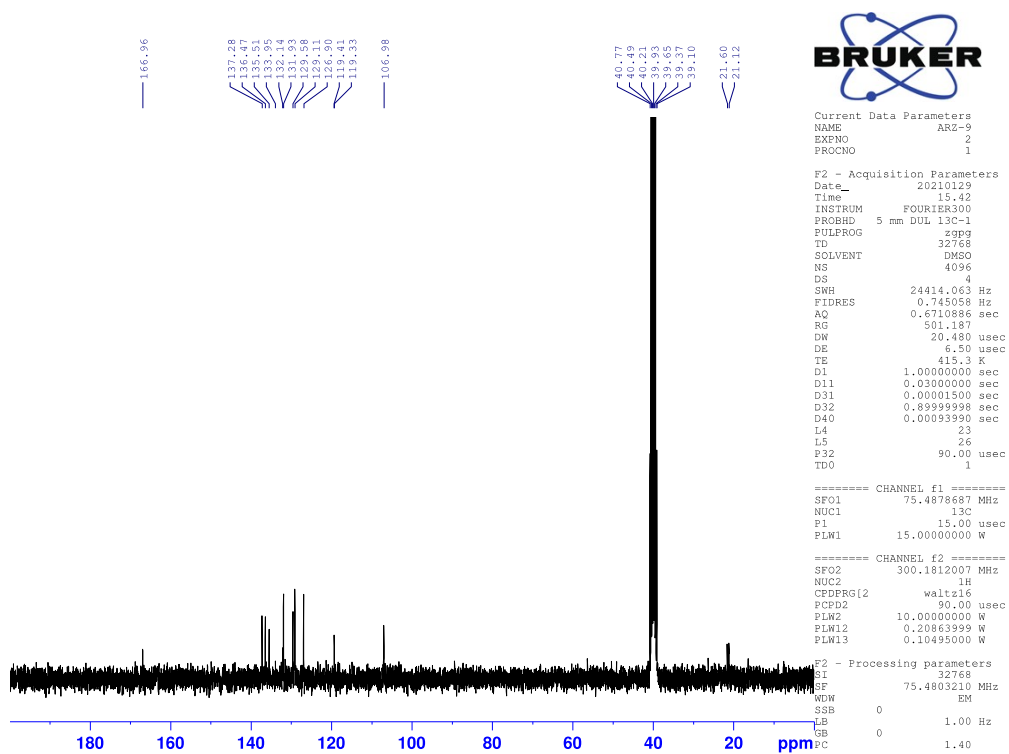

Figure S27. Compound 2i <sup>13</sup>C-NMR spectrum

Data File: C:\LabSolutions\Data\Analiz\derya\ARZ-11\_128.lcd

| Elmt | Val. | Min | Max | Use Adduct |
|------|------|-----|-----|------|------|-----|-----|------|------|-----|-----|------|------|-----|-----|------------|
| H    | 1    | 9   | 40  | O    | 2    | 0   | 4   | S    | 2    | 1   | 2   | Ru   | 2    | 0   | 0   | H          |
| C    | 4    | 10  | 40  | F    | 1    | 0   | 2   | Cl   | 1    | 0   | 1   | Pd   | 2    | 0   | 0   |            |
| N    | 3    | 3   | 6   | P    | 3    | 0   | 0   | Br   | 1    | 0   | 1   | I    | 3    | 0   | 0   |            |

Error Margin (ppm): 5  
 HC Ratio: unlimited  
 Max Isotopes: 3  
 MSn Iso RI (%): 10.00

DBE Range: 8.0 - 25.0  
 Apply N Rule: yes  
 Isotope RI (%): 1.00  
 MSn Logic Mode: AND

Electron Ions: both  
 Use MSn Info: yes  
 Isotope Res: 9000  
 Max Results: 150

Event#: 1 MS(E+) Ret. Time : 3.133 -> 3.293 Scan# : 471 -> 495

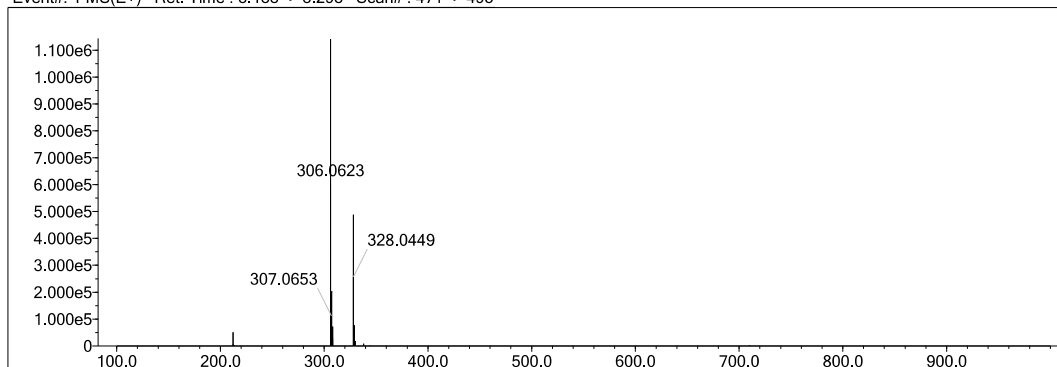

Measured region for 306.0623 m/z

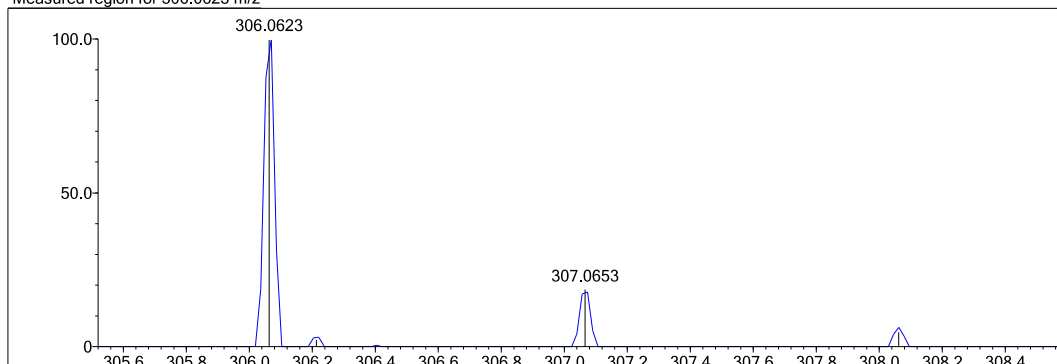

C13 H9 N5 F2 S [M+H]<sup>+</sup> : Predicted region for 306.0619 m/z

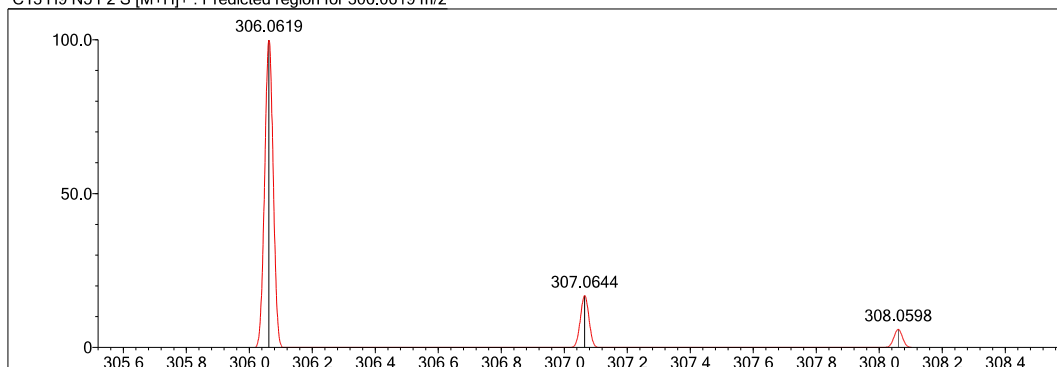

| Rank | Score | Formula (M)    | Ion                | Meas. m/z | Pred. m/z | Df. (mDa) | Df. (ppm) | Iso   | DBE  |
|------|-------|----------------|--------------------|-----------|-----------|-----------|-----------|-------|------|
| 1    | 92.03 | C13 H9 N5 F2 S | [M+H] <sup>+</sup> | 306.0623  | 306.0619  | 0.4       | 1.31      | 92.75 | 11.0 |

Figure S28. Compound 2j HRMS report

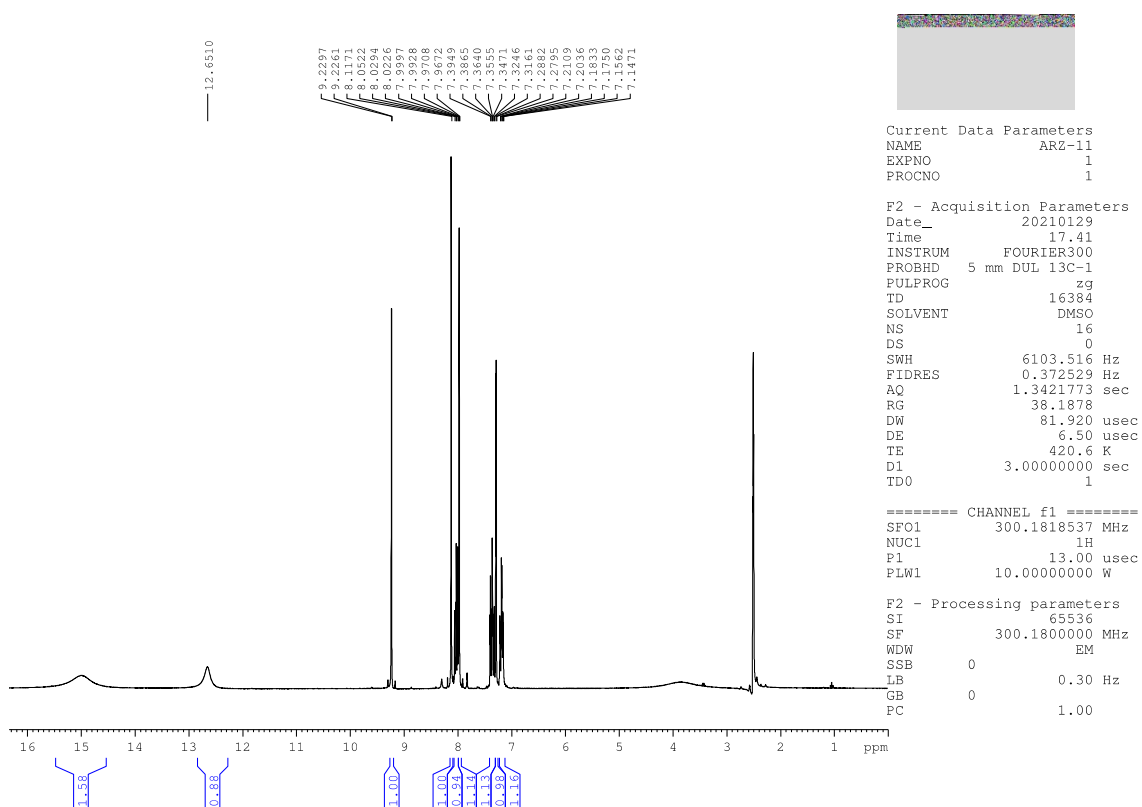

Figure S29. Compound 2j <sup>1</sup>H-NMR spectrum

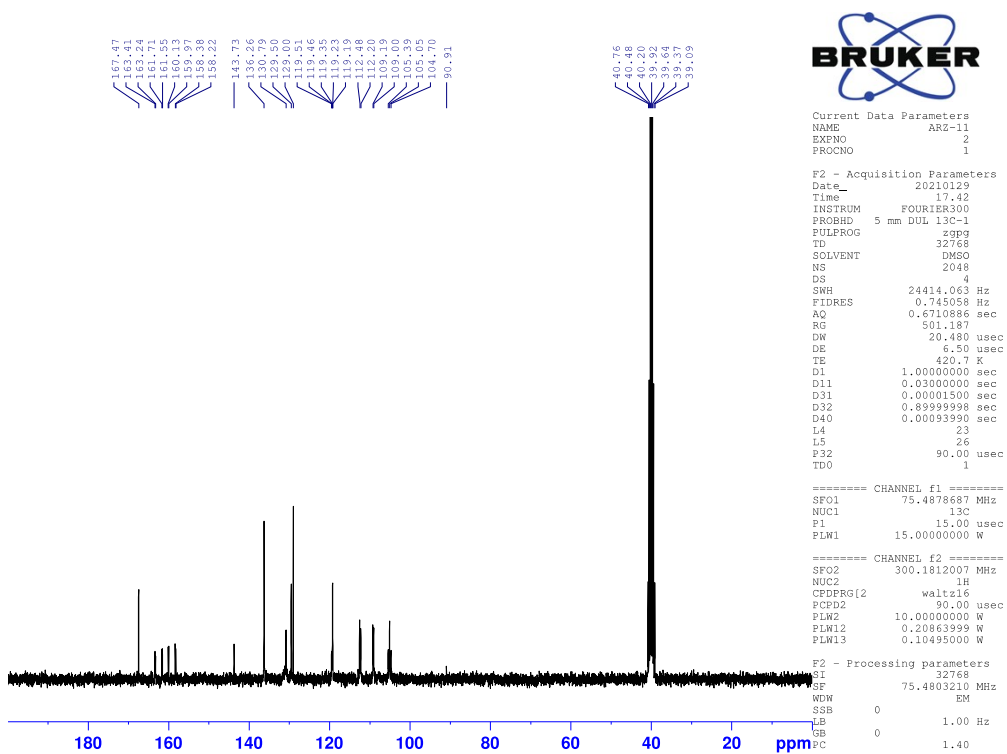

Figure S30. Compound 2j <sup>13</sup>C-NMR spectrum

Data File: C:\LabSolutions\Data\Analiz\derya\ARZ-12\_129.Icd

| Elmt | Val. | Min | Max | Use Adduct |
|------|------|-----|-----|------|------|-----|-----|------|------|-----|-----|------|------|-----|-----|------------|
| H    | 1    | 9   | 40  | O    | 2    | 0   | 4   | S    | 2    | 1   | 2   | Ru   | 2    | 0   | 0   | H          |
| C    | 4    | 10  | 40  | F    | 1    | 0   | 2   | Cl   | 1    | 0   | 2   | Pd   | 2    | 0   | 0   |            |
| N    | 3    | 3   | 6   | P    | 3    | 0   | 0   | Br   | 1    | 0   | 1   | I    | 3    | 0   | 0   |            |

Error Margin (ppm): 5  
 HC Ratio: unlimited  
 Max Isotopes: 3  
 MSn Iso RI (%): 10.00

DBE Range: 8.0 - 25.0  
 Apply N Rule: yes  
 Isotope RI (%): 1.00  
 MSn Logic Mode: AND

Electron Ions: both  
 Use MSn Info: yes  
 Isotope Res: 9000  
 Max Results: 150

Event#: 1 MS(E+) Ret. Time : 3.747 Scan# : 563

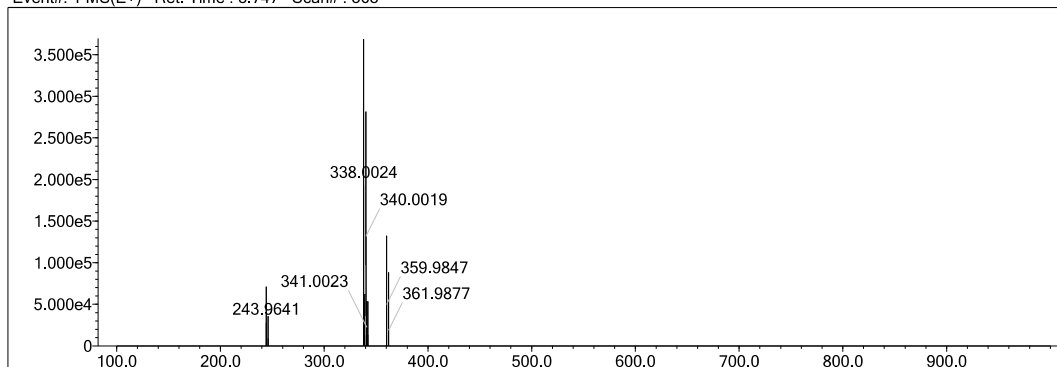

Measured region for 338.0024 m/z

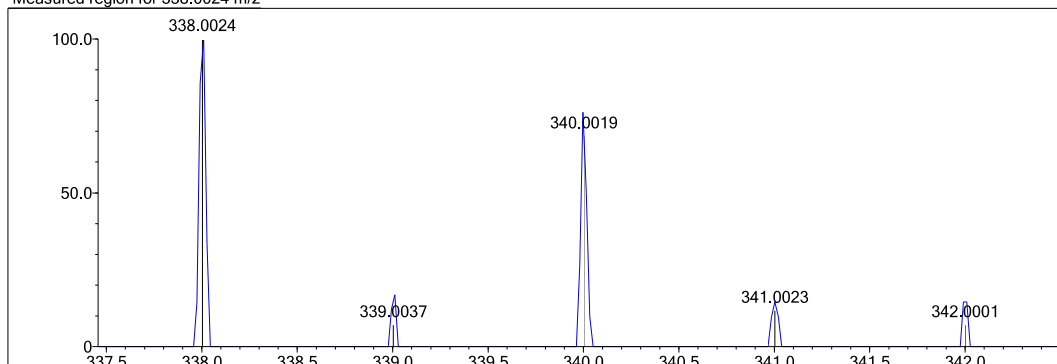

C13 H9 N5 S Cl2 [M+H]<sup>+</sup> : Predicted region for 338.0028 m/z

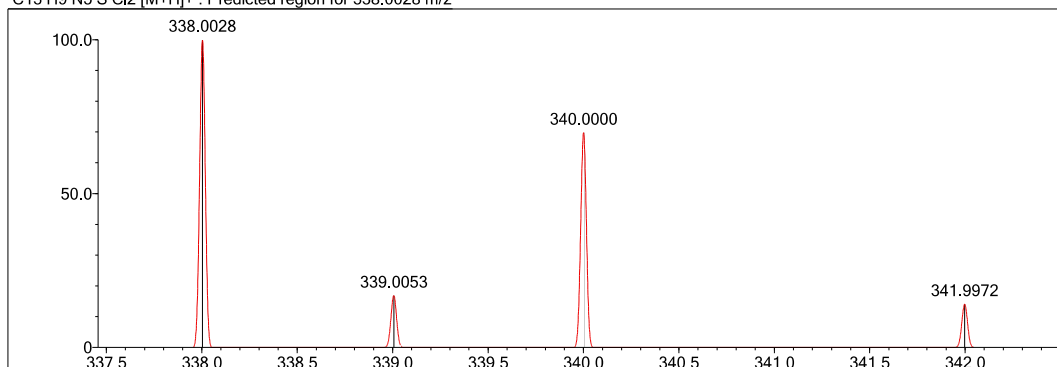

| Rank | Score | Formula (M)     | Ion                | Meas. m/z | Pred. m/z | Df. (mDa) | Df. (ppm) | Iso   | DBE  |
|------|-------|-----------------|--------------------|-----------|-----------|-----------|-----------|-------|------|
| 1    | 89.11 | C13 H9 N5 S Cl2 | [M+H] <sup>+</sup> | 338.0024  | 338.0028  | -0.4      | -1.18     | 89.51 | 11.0 |

Figure S31. Compound 2k HRMS report

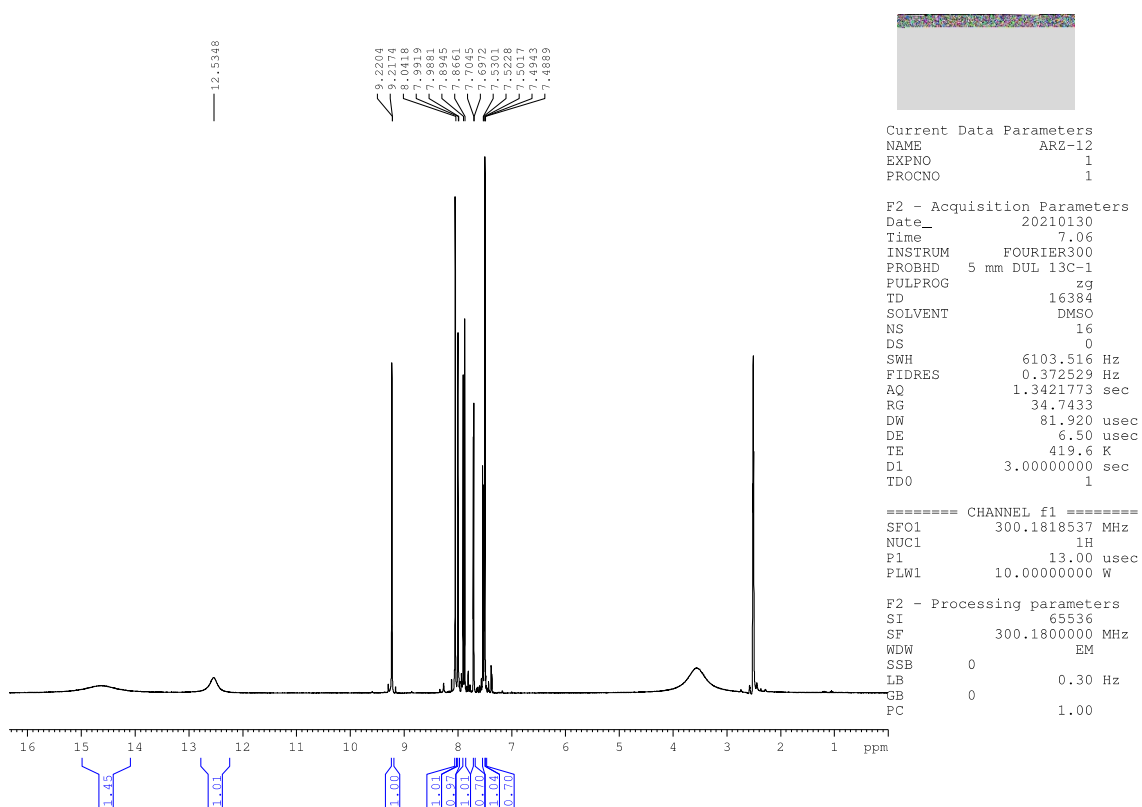

Figure S32. Compound 2k <sup>1</sup>H-NMR spectrum

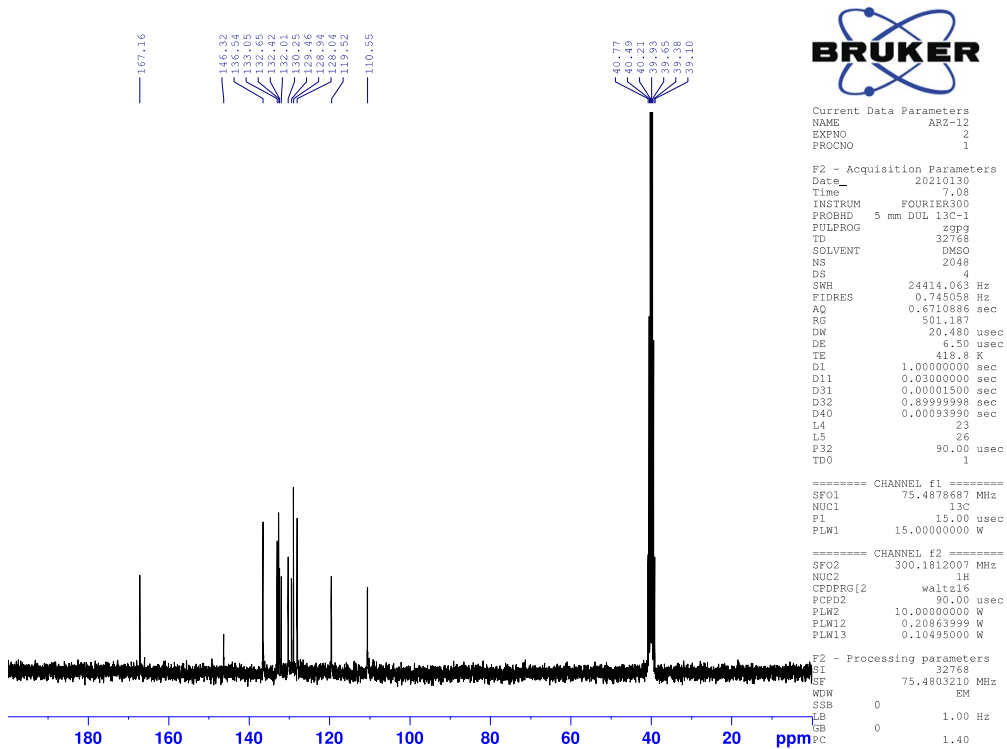

Figure S33. Compound 2k <sup>13</sup>C-NMR spectrum

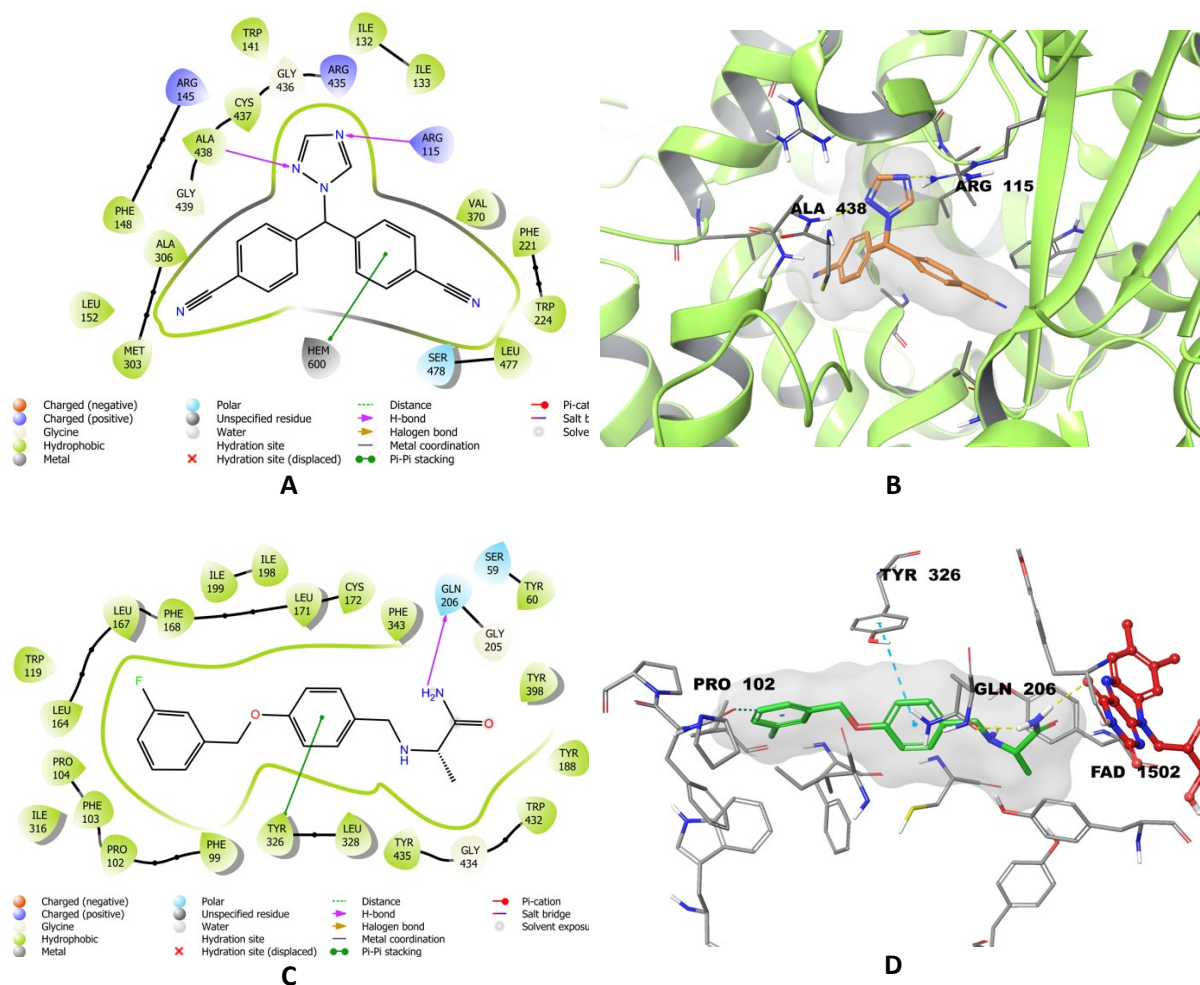

**Figure S34:** The 2D (A) and 3D (B) interacting modes of letrozole (colored with orange) in the active region the human aromatase (PDB ID: 3EQM). The 2D (C) and 3D (D) interacting modes of safinamide (colored with green) in the active region the MAO-B (PDB ID: 2V5Z).
